1 **Epimutations driven by small RNAs arise frequently but have limited duration**  
2 **in a metazoan organism**

3 **Toni Beltran<sup>1,2</sup>, Vahid Shahrezaei<sup>3</sup>, Vaishali Katju<sup>4</sup> and Peter Sarkies<sup>1,2</sup>**

4 <sup>1</sup> MRC London Institute of Medical Sciences, Du Cane Road, London W12 0NN, UK

5 <sup>2</sup> Institute of Clinical Sciences, Imperial College London, Du Cane Road, London,  
6 W12 0NN, UK

7 <sup>3</sup> Department of Mathematics, Faculty of Natural Sciences, Imperial College London,  
8 SW7 2AZ

9 <sup>4</sup> Department of Veterinary Integrative Biosciences, Texas A&M University, 402  
10 Raymond Stotzer Pkwy College Station, TX 77845

11

12 **Epigenetic regulation involves changes in gene expression independent of**  
13 **DNA sequence variation that are inherited through cell division** (Holliday,  
14 2006). **In addition to a fundamental role in cell differentiation, some epigenetic**  
15 **changes can also be transmitted transgenerationally through meiosis** (Heard  
16 and Martienssen, 2014). **Epigenetic alterations (“epimutations”) could thus**  
17 **contribute to heritable variation within populations and be subject to**  
18 **evolutionary processes such as natural selection and drift** (Burggren, 2016).  
19 **However, this suggestion is controversial, partly because unlike classical**  
20 **mutations involving DNA sequence changes, key parameters such as the rate**  
21 **at which epimutations arise and their persistence are unknown. Here, we**  
22 **perform the first genome-wide study of epimutations in a metazoan organism.**  
23 **We use experimental evolution to characterise the rate, spectrum and stability**  
24 **of epimutations driven by small silencing RNAs in the model nematode**  
25 ***C. elegans*. We show that epimutations arise spontaneously at a rate ~25 times**  
26 **greater than DNA sequence changes and typically have short half-lives of 2-3**  
27 **generations. Nevertheless, some epimutations last at least 10 generations.**  
28 **Epimutations thus may contribute to evolutionary processes over a short**  
29 **timescale but are unlikely to bring about long-term divergence without further**  
30 **DNA sequence changes.**

31 In the nematode *Caenorhabditis elegans*, an epigenetic memory of gene silencing  
32 can be transmitted transgenerationally for multiple generations. This extremely  
33 stable form of silencing is initiated by Piwi-interacting small RNAs (piRNAs), leading  
34 to the formation of secondary small RNAs known as 22G-RNAs by RNA-dependent  
35 RNA polymerase (RdRP) activity (Ashe et al., 2012; Luteijn et al., 2012; Shirayama  
36 et al., 2012). 22G-RNAs and their associated Argonaute HRDE-1 are transmitted  
37 through gametes, and are required for the maintenance of silencing each generation  
38 (Buckley et al., 2012), where 22G-RNA amplification can continue independently of  
39 the initial trigger (Sapetschnig et al., 2015).

40 So far, mechanistic investigation of transgenerational epigenetic inheritance of 22G-  
41 RNAs has largely been confined to transgenes and artificial induction of RNAi from  
42 exogenous sources (Ashe et al., 2012; Buckley et al., 2012; Luteijn et al., 2012;  
43 Shirayama et al., 2012). The transgenerational dynamics of small RNA populations  
44 targeting endogenous genes are, in contrast, very poorly understood (de  
45 Albuquerque et al., 2015; Phillips et al., 2015). In particular, whether epigenetic  
46 inheritance can provide an additional layer of heritable biological variation for  
47 evolutionary forces to act on remains obscure. This idea is controversial, since key  
48 parameters regarding the stability of epigenetic states across generations are  
49 unknown.

50 To investigate whether 22G-RNA-mediated epimutations occur at endogenous  
51 genes in *C. elegans*, we used a mutation accumulation (MA) approach. Mutation  
52 accumulation lines are used in classical evolutionary biology in order to provide  
53 unbiased estimates of mutation rates (Katju and Bergthorsson, 2019). In the MA  
54 approach, multiple lines are propagated independently from a common ancestor for  
55 several generations. Crucially, the population is repeatedly passed through  
56 bottlenecks containing very few individual organisms. Since *C. elegans* is a  
57 hermaphrodite, the minimal bottleneck size is a single individual. This approach  
58 strongly reduces the ability of natural selection to eliminate deleterious mutations,  
59 thus enabling an unbiased estimate of the true spectrum of mutations to be made  
60 (Katju and Bergthorsson, 2019). We employed *C. elegans* MA lines grown at a  
61 population size of 1 over multiple generations (Katju et al., 2018; Konrad et al., 2018)  
62 to investigate epimutations (Fig. 1a). We reasoned that loci subject to epimutations  
63 would show alterations in 22G-RNA levels relative to the parental line. Such changes  
64 could arise in individual lines as a result of stochastic processes such as  
65 environmental fluctuations, developmental noise, or intrinsic noise in the pathways of  
66 epigenetic regulation. Crucially, since the lines were maintained under identical  
67 conditions (Katju et al., 2018; Konrad et al., 2018), long term maintenance of 22G-  
68 RNA alterations within lines over multiple generations might indicate epigenetic  
69 transmission.

70 We used high throughput small RNA sequencing to map candidate epimutations in  
71 11 MA lines after 25 and 100 MA generations (MA25 and MA100 respectively). We  
72 were able to robustly identify genes with significantly larger changes in 22G-RNA  
73 levels than expected given their mean 22G-RNA level ( $FDR < 10^{-4}$ , Methods;  
74 examples in Fig. 1b and Fig. 1c). We detected a total of 422 genes with significant  
75 changes in 22G-RNAs in at least one MA line. These events are candidates for  
76 epimutations as they may be inherited across generations. On average, we detected  
77 around 70 candidate epimutations in each line, and the overall number of candidate  
78 epimutations was similar in MA25 and MA100 lines (Fig. 1d,e, Supp. Fig. 1). Notably,  
79 over 25 generations, the expected number of fixed point mutations and small indels  
80 is  $\sim 4.61$  according to the estimated mutation rate from the same lines (Konrad et al.,  
81 2019). In addition, only a tiny fraction of mutations detected after 400 generations  
82 (Konrad et al., 2019) overlapped with epimutations (Supp. Fig. 2a-c). The majority of  
83 changes in 22G-RNAs are therefore unlikely to be due to genetic differences.



84 Genes subject to changes in 22G-RNAs overlapped significantly with piRNA (Tang et  
85 al., 2016), HRDE-1 (Shirayama et al., 2012) and WAGO-1 (Gu et al., 2009) target  
86 genes, but not with genes targeted by CSR-1 (Claycomb et al., 2009), which has  
87 been proposed to oppose the silencing activity of other germline RNAi pathways  
88 (Seth et al., 2013; Wedeles et al., 2013) (Fig. 1f). We also detected several changes  
89 in 22G-RNAs at transposable elements (TEs), and indeed TEs were enriched for  
90 these alterations (Supp. Fig. 9a,b). Together, this suggests that stochastic changes  
91 in small RNAs at individual genes and repetitive elements occur frequently during *C.*  
92 *elegans* propagation under minimal population size.

93 Changes in small RNAs in individual lines could reflect changes driven by  
94 environmental or developmental fluctuations lasting only one generation or could  
95 reflect epigenetic inheritance of changes that occurred in previous generations. To  
96 test whether long-term inheritance of changes in small RNAs occurs, we compared  
97 individual genes between MA25 and MA100 lines. Only a minority of changes in  
98 22G-RNA levels were retained ( $13 \pm 3\%$  mean and 95% confidence intervals; Fig. 2a,  
99 Supp. Fig. 9c). Given the fast rate at which changes in small RNAs arose, the small  
100 percentage shared between the same MA25 and MA100 line may have arisen  
101 independently. Indeed, across the set of genes, alterations in 22G-RNAs were no  
102 more likely to be shared between the same MA25 and MA100 line than expected by  
103 chance (Fig. 2b,c). Similarly, there was no significant tendency for the variance in  
104 22G-RNA levels at either genes or TEs to be lower within lineages than between  
105 lineages (Fig. 2b,c; Supp. Fig. 9d). We therefore conclude that the alterations in  
106 22G-RNA levels have limited stability such that few survived over the course of 75  
107 generations (examples in Fig. 2d,e; Supp. Fig. 3a,b for the few examples reaching  
108 significance).

109 Having established that long-lasting epimutations are rare in *C. elegans*, we sought  
110 to investigate the persistence of alterations in 22G-RNAs over shorter  
111 timescales. We propagated two MA lines for 13 generations, and sequenced small  
112 RNAs at each generation (Fig. 3a). We identified genes with significant ( $FDR < 10^{-4}$ )  
113 changes in 22G-RNA levels between any two generations within each lineage. The  
114 genes identified in this experiment overlapped significantly (35%) with the candidate  
115 epimutations in MA25 and MA100 lines, and with piRNA, HRDE-1 and WAGO-1  
116 targets, but not CSR-1 targets (Fig. 3b). Within this set of genes, the correlation  
117 coefficients between samples decreased with increasing distance in generations,  
118 suggesting that the level of 22G-RNAs targeting these genes is inherited  
119 transgenerationally (Fig. 3c).

120 To characterise the rate and stability of alterations in 22G-RNAs we classified the  
121 count data across the two lineages into high and low small RNA level states  
122 (Methods, Fig. 3d, Fig. 3e). Based on this classification, we observed a median of  
123 23.5 newly arising changes in 22G-RNAs per generation (Fig. 3f). This figure can be  
124 compared directly with the rate of DNA sequence mutations. Single nucleotide  
125 substitution and small indel rate estimates range from 0.2 to 1 changes per genome  
126 per generation (Denver et al., 2004, 2009; Konrad et al., 2019; Meier et al., 2014).  
127 Similarly, the rate of larger genomic duplications and deletions has been estimated to

128 be of  $6.5 \times 10^{-3}$  per genome per generation (Konrad et al., 2018). The rate at which  
129 changes in 22G-RNAs arise is therefore at least 25 times greater.

130 Crucially, Many changes in 22G-RNAs persist for several generations, marking them  
131 out as genuine epimutations that can be transmitted transgenerationally (examples  
132 in Fig. 3d, Fig. 3e, Fig. 3g). We quantified the duration of epimutations using survival  
133 analysis, revealing a median survival of 2-3 generations considering all epimutations  
134 (Fig. 3h). Epimutations exhibiting increased 22G-RNAs (gains) had a median  
135 survival of 2 generations, while epimutations with decreased 22G-RNAs (losses) had  
136 a significantly greater median survival of 4 generations ( $p < 1e-4$  Mantel log-rank test,  
137 Fig. 3h). Interestingly, 42% of losses of 22G-RNAs remained stable after 12  
138 generations, in contrast to only 5% of gains of 22G-RNAs (Fig. 3h). Gains of 22G-  
139 RNAs affecting genes targeted by piRNAs, WAGO-1 or HRDE-1 tended to have  
140 increased stability, while the few occurring in CSR-1 targets were extremely unstable  
141 (Supp. Fig. 4), consistent with a protective role of CSR-1 against stochastic  
142 silencing (Seth et al., 2013; Wedeles et al., 2013).

143 Interestingly, some epimutations showed a gradual change in 22G-RNAs (Fig. 3d),  
144 while others showed a clear shift between high and low small RNAs, indicating the  
145 possibility of bistability (Supp. Fig. 5a). To examine this across all epimutations, we  
146 examined the change in 22G-RNA levels across a 6-generation window centred on  
147 the generation in which the epimutation was identified (Supp. Fig. 5b,c). We  
148 identified three categories of epimutation. Most genes showed either fluctuating  
149 small RNA levels or evidence of bistable behaviour, while less than 10% (8/145)  
150 showed evidence of a gradual change in 22G-RNAs (Supp. Fig. 5d,e). Epimutable  
151 genes showing bistable and gradual changes were significantly enriched for piRNA  
152 targets ( $p < 0.01$ , Fisher's Exact Test), but not for HRDE-1 or WAGO-1 targets (Supp.  
153 Fig. 5f). Bistable and gradual changes tended to last longer than epimutations at  
154 genes displaying fluctuating levels of 22G-RNAs (Supp. Fig. 5g).

155 The existence of different types of transgenerational dynamics in 22G-RNA levels  
156 prompted us to test the heritability of small RNA levels using an alternative method.  
157 We reasoned that transgenerational inheritance of 22G-RNA levels would result in  
158 reduced variance between consecutive generations ("intergenerational variance")  
159 compared to the total variance (Supp. Fig. 6a). We identified 321 genes following this  
160 premise (permutation test  $FDR < 0.1$ ; Supp. Fig. 6b,c). Within these genes, we  
161 extracted the duration of runs of consecutive generations with low intergenerational  
162 variance (Supp. Fig. 6d), recovering a median duration of 2 generations. This  
163 analysis thus further supports the existence of heritable variation in 22G-RNA levels  
164 that lasts for  $\sim 2$ -3 generations on average (Supp. Fig. 6e).

165 To examine the effect of small RNA-mediated epimutations on gene expression, we  
166 performed high-throughput RNA sequencing across the 12 generations, as well as  
167 MA25 and MA100 lines. Genes exhibiting epimutations were enriched for correlated  
168 changes in mRNA levels (Supp. Fig. 7a,c; simulation test  $p = 0.036$ ), and larger  
169 absolute changes in 22G-RNA levels were correlated with larger changes in mRNA  
170 levels (Supp. Fig. 7b). Changes in mRNA levels in the opposite direction to changes  
171 in 22G-RNAs were enriched (simulation test  $p = 0.01$ , Supp. Fig 7c) but we also

172 observed changes in the same direction, indicating that epimutations sometimes, but  
173 not always, correspond to gene silencing (Supp. Fig. 7d,e). It is possible that  
174 correlated increases in both small RNA and mRNA levels represent small RNA-  
175 mediated compensation for changes in expression level driven by other epigenetic  
176 changes. We find that the proportion of this class of epimutations is significantly  
177 higher in repressive chromatin regions (Evans et al., 2016) (Supp. Fig. 7f,g),  
178 suggesting that small RNAs might be responding to a loss of chromatin-mediated  
179 silencing.

180 Given the limited duration of epimutations, we speculated that the epimutations that  
181 we identify might represent extreme examples of fluctuations in some classes of  
182 small RNA levels at a subset of genes. We used our sequencing data to estimate the  
183 variability in 22G-RNAs across lineages, and compared this value to an estimate of  
184 the technical noise (Fig. 4a). 22G-RNAs levels are clearly more variable than  
185 technical noise, validating our approach, and allowing us to define genes with  
186 hypervariable small RNAs (“HV22Gs”) (FDR<0.1 in MA25, FDR<0.01 in MA100, Fig.  
187 4a). No miRNAs and very few piRNAs showed increased variability, demonstrating  
188 that this effect is specific for 22G-RNAs (Supp. Fig 8a,b). HRDE-1, WAGO-1, piRNA  
189 target genes and transposable elements showed higher variability in small RNA  
190 levels and were enriched for HV22Gs, while CSR-1 targets were depleted (Fig. 4b-f;  
191 Supp Fig. 9e,f). Almost all epimutable genes were recovered as HV22Gs in this  
192 analysis (Fig. 4c). Genes identified as epimutated exclusively in MA25 lines, but not  
193 in MA100 lines nevertheless showed increased variability in the MA100 lines, and  
194 vice versa (Supp. Fig. 8c,d). This supports the hypothesis that epimutable genes  
195 show hypervariability in 22G-RNAs. HV22Gs did not show increased variability at the  
196 mRNA level (Supp. Fig. 8e,f). Interestingly, however, HV22Gs tended to exhibit  
197 reduced mRNA levels (Fig. 4g, Supp Fig. 8g-h). 22G-RNAs that are produced  
198 downstream of piRNA targeting establish a positive feedback loop by stimulating  
199 further production of 22G-RNAs through RNA dependent RNA polymerase  
200 (Sapetschnig et al., 2015), but also promote silencing of their targets, leading to a  
201 fine balance between silencing and maintenance of 22G-RNA populations. Coupled  
202 with low availability of templates for amplification, this might lead to fluctuations in  
203 small RNA levels at targets of silencing pathways. Since 22G-RNAs are heritable  
204 (Ashe et al., 2012; Buckley et al., 2012; Luteijn et al., 2012; Shirayama et al., 2012),  
205 we propose that these fluctuations manifest as epimutations that can exhibit  
206 bistability but last only a few generations (Fig. 4h). In contrast, CSR-1 targets have  
207 higher mRNA levels (Supp. Fig. 8i) thus they have more stable 22G-RNA levels and  
208 are less liable to epimutations.

209 Taken together, our results provide the first demonstration that small RNA-mediated  
210 epimutations arise during experimental evolution in a metazoan organism. We  
211 measure their rate, spectrum, and stability and provide a plausible mechanism for  
212 their formation and disappearance. Our results suggest that epigenetic inheritance  
213 carried by small RNAs and traditional genetic inheritance carried by DNA sequence  
214 alterations exist at opposite ends of a spectrum: epimutations arise rapidly but have  
215 limited stability, while mutations arise at a lower rate but are stably  
216 inherited. Epigenetic inheritance thus offers the potential to stimulate adaptation over  
217 short timescales, but is unlikely to contribute to long-term inheritance without

218 contribution from DNA sequence changes. Interestingly, the short-term nature of  
219 epimutations driven by small RNAs in *C. elegans* also characterizes epimutations  
220 due to DNA methylation in plants (Becker et al., 2011; van der Graaf et al., 2015;  
221 Hagmann et al., 2015; Schmitz et al., 2011), and indeed *C. elegans* possesses  
222 mechanisms that limit the duration of RNAi silencing (Lev et al., 2017; Perales et al.,  
223 2018).

224  
225

## 226 References

227

- 228 de Albuquerque, B.F.M., Placentino, M., and Ketting, R.F. (2015). Maternal piRNAs  
229 Are Essential for Germline Development following De Novo Establishment of Endo-  
230 siRNAs in *Caenorhabditis elegans*. *Dev. Cell* *34*, 448–456.
- 231 Ashe, A., Sapetschnig, A., Weick, E.M., Mitchell, J., Bagijn, M.P., Cording, A.C.,  
232 Doebley, A.L., Goldstein, L.D., Lehrbach, N.J., Le Pen, J., et al. (2012). PiRNAs can  
233 trigger a multigenerational epigenetic memory in the germline of *C. elegans*. *Cell*  
234 *150*, 88–99.
- 235 Becker, C., Hagmann, J., Müller, J., Koenig, D., Stegle, O., Borgwardt, K., and  
236 Weigel, D. (2011). Spontaneous epigenetic variation in the *Arabidopsis thaliana*  
237 methylome. *Nature* *480*, 245–249.
- 238 Buckley, B.A., Burkhart, K.B., Gu, S.G., Spracklin, G., Kershner, A., Fritz, H., Kimble,  
239 J., Fire, A., and Kennedy, S. (2012). A nuclear Argonaute promotes  
240 multigenerational epigenetic inheritance and germline immortality. *Nature* *489*, 447–  
241 451.
- 242 Burggren, W. (2016). Epigenetic Inheritance and Its Role in Evolutionary Biology:  
243 Re-Evaluation and New Perspectives. *Biology (Basel)*. *5*, 24.
- 244 Claycomb, J.M., Batista, P.J., Pang, K.M., Gu, W., Vasale, J.J., van Wolfswinkel,  
245 J.C., Chaves, D.A., Shirayama, M., Mitani, S., Ketting, R.F., et al. (2009). The  
246 Argonaute CSR-1 and Its 22G-RNA Cofactors Are Required for Holocentric  
247 Chromosome Segregation. *Cell* *139*, 123–134.
- 248 Denver, D.R., Morris, K., Lynch, M., and Thomas, W.K. (2004). High mutation rate  
249 and predominance of insertions in the *Caenorhabditis elegans* nuclear genome.  
250 *Nature* *430*, 679–682.
- 251 Denver, D.R., Dolan, P.C., Wilhelm, L.J., Sung, W., Lucas-Lledó, J.I., Howe, D.K.,  
252 Lewis, S.C., Okamoto, K., Thomas, W.K., Lynch, M., et al. (2009). A genome-wide  
253 view of *Caenorhabditis elegans* base-substitution mutation processes. *Proc. Natl.*  
254 *Acad. Sci.* *106*, 16310 LP – 16314.
- 255 Evans, K.J., Huang, N., Stempor, P., Chesney, M.A., Down, T.A., and Ahringer, J.  
256 (2016). Stable *Caenorhabditis elegans* chromatin domains separate broadly  
257 expressed and developmentally regulated genes. *Proc. Natl. Acad. Sci.* *113*,  
258 E7020–E7029.
- 259 van der Graaf, A., Wardenaar, R., Neumann, D.A., Taudt, A., Shaw, R.G., Jansen,  
260 R.C., Schmitz, R.J., Colomé-Tatché, M., and Johannes, F. (2015). Rate, spectrum,  
261 and evolutionary dynamics of spontaneous epimutations. *Proc. Natl. Acad. Sci.* *112*,  
262 6676–6681.
- 263 Gu, W., Shirayama, M., Conte Jr., D., Vasale, J., Batista, P.J., Claycomb, J.M.,  
264 Moresco, J.J., Youngman, E.M., Keys, J., Stoltz, M.J., et al. (2009). Distinct  
265 Argonaute-Mediated 22G-RNA Pathways Direct Genome Surveillance in the *C.*



266 *C. elegans* Germline. *Mol. Cell* **36**, 231–244.

267 Hagmann, J., Becker, C., Müller, J., Stegle, O., Meyer, R.C., Wang, G.,  
268 Schneeberger, K., Fitz, J., Altmann, T., Bergelson, J., et al. (2015). Century-scale  
269 Methyloome Stability in a Recently Diverged *Arabidopsis thaliana* Lineage. *PLoS*  
270 *Genet.* **11**, e1004920.

271 Heard, E., and Martienssen, R.A. (2014). Transgenerational epigenetic inheritance:  
272 Myths and mechanisms. *Cell*.

273 Holliday, R. (2006). Epigenetics: A historical overview. *Epigenetics* **1**, 76–80.

274 Katju, V., and Bergthorsson, U. (2019). Old Trade, New Tricks: Insights into the  
275 Spontaneous Mutation Process from the Partnering of Classical Mutation  
276 Accumulation Experiments with High-Throughput Genomic Approaches. *Genome*  
277 *Biol. Evol.* **11**, 136–165.

278 Katju, V., Packard, L.B., and Keightley, P.D. (2018). Fitness decline under osmotic  
279 stress in *Caenorhabditis elegans* populations subjected to spontaneous mutation  
280 accumulation at varying population sizes. *Evolution (N. Y.)*. **72**, 1000–1008.

281 Konrad, A., Flibotte, S., Taylor, J., Waterston, R.H., Moerman, D.G., Bergthorsson,  
282 U., and Katju, V. (2018). Mutational and transcriptional landscape of spontaneous  
283 gene duplications and deletions in *Caenorhabditis elegans*. *Proc. Natl. Acad. Sci.*  
284 **115**, 7386–7391.

285 Konrad, A., Brady, M.J., Bergthorsson, U., and Katju, V. (2019). Mutational  
286 landscape of spontaneous base substitutions and small indels in experimental  
287 *Caenorhabditis elegans* populations of differing size. *Genetics* **212**, 837–854.

288 Lev, I., Seroussi, U., Gingold, H., Bril, R., Anava, S., and Rechavi, O. (2017). MET-2-  
289 Dependent H3K9 Methylation Suppresses Transgenerational Small RNA Inheritance.  
290 *Curr. Biol.* **27**, 1138–1147.

291 Luteijn, M.J., van Bergeijk, P., Kaaij, L.J.T., Almeida, M.V., Roovers, E.F., Berezikov,  
292 E., and Ketting, R.F. (2012). Extremely stable Piwi-induced gene silencing in  
293 *Caenorhabditis elegans*. *EMBO J.* **31**, 3422–3430.

294 Meier, B., Cooke, S.L., Weiss, J., Bailly, A.P., Alexandrov, L.B., Marshall, J., Raine,  
295 K., Maddison, M., Anderson, E., Stratton, M.R., et al. (2014). *C. elegans* whole-  
296 genome sequencing reveals mutational signatures related to carcinogens and DNA  
297 repair deficiency. *Genome Res.* **24**, 1624–1636.

298 Perales, R., Pagano, D., Wan, G., Fields, B.D., Saltzman, A.L., and Kennedy, S.G.  
299 (2018). Transgenerational Epigenetic Inheritance Is Negatively Regulated by the  
300 HERI-1 Chromodomain Protein. *Genetics* genetics.301456.2018.

301 Phillips, C.M., Brown, K.C., Montgomery, B.E., Ruvkun, G., and Montgomery, T.A.  
302 (2015). piRNAs and piRNA-Dependent siRNAs Protect Conserved and Essential  
303 *C. elegans* Genes from Misrouting into the RNAi Pathway. *Dev. Cell* **34**, 457–465.

304 Sapetschnig, A., Sarkies, P., Lehrbach, N.J., and Miska, E.A. (2015). Tertiary  
305 siRNAs Mediate Paramutation in *C. elegans*. *PLoS*  
306 *Genet* **11**, e1005078.

307 Schmitz, R.J., Schultz, M.D., Lewsey, M.G., O'Malley, R.C., Urich, M.A., Libiger, O.,  
308 Schork, N.J., and Ecker, J.R. (2011). Transgenerational epigenetic instability is a  
309 source of novel methylation variants. *Science* **334**, 369–373.

310 Seth, M., Shirayama, M., Gu, W., Ishidate, T., Conte, D., and Mello, C. (2013). The  
311 *C. elegans* CSR-1 argonaute pathway counteracts epigenetic silencing to promote  
312 germline gene expression. *Dev. Cell* **27**, 656–663.

313 Shirayama, M., Seth, M., Lee, H.-C., Gu, W., Ishidate, T., Conte, D., and Mello, C.C.



314 (2012). piRNAs initiate an epigenetic memory of nonself RNA in the *C. elegans*  
315 germline. *Cell* *150*, 65–77.  
316 Tang, W., Tu, S., Lee, H.C., Weng, Z., and Mello, C.C. (2016). The RNase PARN-1  
317 Trims piRNA 3' Ends to Promote Transcriptome Surveillance in *C. elegans*. *Cell* *164*,  
318 974–984.  
319 Wedeles, C., Wu, M., and Claycomb, J. (2013). Protection of germline gene  
320 expression by the *C. elegans* argonaute CSR-1. *Dev. Cell* *27*, 664–671.  
321

322 **Figure legends**

323 **Figure 1. Identification of small RNA-mediated epimutations in *C. elegans***  
324 **mutation accumulation lines.**

325 a. Experimental design. 11 lineages of *C. elegans* nematodes were grown at a  
326 population size of 1 individual, for 100 generations. Small RNA sequencing was  
327 carried out for each lineage at 25 and 100 generations, as well as the parental strain  
328 before epimutation accumulation (PeMA).

329 b. Identification of epimutations. Epimutable genes are defined as genes with large  
330 fold changes in 22G levels in at least one pairwise comparison, compared to genes  
331 of similar 22G abundance ( $FDR < 1e-4$ ). K-means clustering was applied on the  
332 normalised count data to define groups of samples with high and low small RNA  
333 levels.

334 c. 22G signal profiles for representative examples of epimutations. The top panel  
335 shows an epimutation affecting two nearby genes.

336 d. Dot plots depicting the distribution of Pearson correlation coefficients between  
337 lines as a function of the distance in number of generations. Significance was tested  
338 using a two-sided Wilcoxon rank sum test.

339 e. Number of epimutations detected after 25 and 100 generations.

340 f. Overlap of epimutated genes with previously annotated small RNA pathway target  
341 genes. The significance of the overlap is indicated by the colour of the heatmap.

342

343 **Figure 2. Absence of evidence for long-term inheritance of epimutations.**

344 a. Unique and shared epimutation totals in MA25 and MA100 lines, showing that  
345 only a small fraction of epimutations is maintained.

346 b. Test for long-term epigenetic inheritance. The number of matching states in pairs  
347 of MA25 and MA100 lines of the same lineage was calculated, and compared to the  
348 expected number of matches when randomly pairing MA25 and MA100 lines (epi-  
349 states test; see methods). Similarly, the variance in pairs of MA25 and MA100 lines  
350 of the same lineage was calculated and compared to the expected variance in  
351 random pairs (variance test; see methods).

352 c. Histograms of p-values and Benjamini-Hochberg False Discovery Rate-corrected  
353 p-values of both tests, showing that virtually no cases remain significant after  
354 multiple testing correction.

355 d-e. Genome browser windows showing examples of unstable epimutations mapped  
356 onto the *C. elegans* genome (ce11).

357

358 **Figure 3. Characterisation of the short term dynamics of epimutations.**

359 a. Experimental design. Two 13-generation lineages were grown, by picking a single  
360 L4 stage worm as a founder for the next generation. For each generation, the  
361 remaining worm populations were synchronised using hypochlorite treatment and  
362 grown to adulthood to obtain RNA.

363 b. Overlap of epimutated genes with small RNA pathway target genes.

364 c. Correlation coefficients between samples in the consecutive generation  
365 experiment, as a function of separation in number of generations.

366 d-e. Example of an epimutation lasting 5 generations.

367 f. Dot plot showing the distribution of the number of newly arising epimutations in  
368 each of the generations of lineages A and B.

369 g. Distribution of epimutation duration. Epimutations were split in two groups  
370 according to whether they revert within the lineage (complete), or whether they  
371 remain stable until the end of the observation window (incomplete, censored).

372 h. Survival curves for epimutations consisting of a gain or a loss of small RNAs.

373

374 **Figure 4. Silencing small RNA pathways show hypervariability in 22G-RNA**  
375 **levels.**

376 a. Identification of genes with highly variable 22Gs (HV22Gs). The squared  
377 coefficients of variation in 22G-RNA levels are plotted against the mean. The  
378 technical noise fit is shown in pink, dashed lines represent 95% confidence intervals  
379 for the fit. Genes showing increased variability compared to technical noise are  
380 highlighted in red.

381 b. Overlap of HV22Gs with small RNA pathway target genes. The significance of the  
382 overlap is represented by the colour of the heatmap.

383 c. Overlap of HV22Gs with epimutable genes.

384 d. Comparison of variability in 22G-RNA levels for different small RNA pathway gene  
385 targets.

386 e-f. Quantification of variability in 22G-RNA levels for different small RNA pathway  
387 gene targets. E shows Z-score distributions calculated on the basis of the distribution  
388 of technical noise for each of the gene classes. F shows the distribution of Fano  
389 factors for each of the gene classes. Box plot shows interquartile range with a line at

390 median, and whiskers extend to the greatest point no more than 1.5 times the  
391 interquartile range.

392 g. Comparison of mRNA abundance of HV22Gs and non-HV22Gs for all genes, and  
393 within small RNA pathway gene targets. Genes with >20 normalised 22G counts  
394 were considered for this analysis. Box plot shows interquartile range with a line at  
395 median, and whiskers extend to the greatest point no more than 1.5 times the  
396 interquartile range

397 h. Model for the emergence of epimutations. CSR-1 target genes do not undergo  
398 epimutations due to (1) high mRNA abundance and (2) the protective role of CSR-1  
399 from silencing activities. In contrast, silencing small RNA pathway targets show a  
400 high level of variability in 22G-RNAs. This arises due to a combination of (1) low  
401 mRNA abundance, and (2) the ability of 22G-RNA populations to self-sustain,  
402 establishing a positive feedback for 22G-RNA amplification. Epimutations are an  
403 extreme example of this process, leading to heritable epigenetic variation.

404

405 **Supplementary Figure Legends**

406 **Supplementary Figure 1. Correlation analysis of the 22G-RNA counts dataset.**

407 Heatmap depicting all vs all correlation values calculated for the set of epimutated  
408 genes in MA25 and MA100 lines, after log<sub>2</sub> transformation of the normalised counts  
409 matrix.

410 **Supplementary Figure 2. Minimal overlap of epimutations and genetic  
411 mutations across lineages.**

412 a. Overlap between genetic mutations detected by high throughput genome  
413 sequencing after 400 generations of selfing (MA400 lines, Konrad et. al., 2019), and  
414 epimutations detected in MA25 and MA100 lines.

415 b. Representative examples of 22G-RNA counts across lines for epimutable genes  
416 with an overlapping mutation in any one line, regardless of their epimutation status.  
417 A mutation was considered to overlap with a gene if located within the gene or 1kb  
418 flanking regions. Lines with an overlapping mutation are shown in red.

419 c. 22G-RNA counts in the two epimutations in lineage G overlapping with genetic  
420 mutations as in b.

421 **Supplementary Figure 3. Examples of long-lasting epimutations and genes  
422 with reduced within-lineage variation.**

423 a. 22G normalised counts across lines for genes showing low p-values in both the  
424 variance test ( $p_{var}$ ) and the epistates test ( $p_{st}$ ). N indicates the number of matching  
425 states. The red line indicates the threshold separating high and low small RNA states  
426 according to k-means clustering.

427 b. 22G signal profile for F52C9.1.2 in the parental line (PeMA), in lineage D  
428 (epimutated) and lineage F (no change in 22G-RNAs).

429 **Supplementary Figure 4: Comparison of methods for survival analysis of  
430 epimutations.**

431 a-b. Comparison of methods to estimate the duration of epimutations. Duration  
432 distributions are shown in A, and survival curves in B.

433 c. Genomic features influencing the duration of epimutations. Survival curves  
434 estimated from either the k-means or the HMM datasets are shown, showing  
435 qualitatively similar trends.

436 **Supplementary Figure 5: Dynamics of transgenerational 22G-RNA changes**

437 a. Example of a gene displaying bistable 22G-RNA levels (compare with Fig. 3d).



- 438 b. Method to examine the transition in 22G-RNA levels around the epimutation.  
439 Three generations before and after the transition were selected, and a linear model  
440 was fit to the data, recovering an  $r^2$  that represents the linearity of the change.
- 441 c. Histogram illustrating the distribution of  $r^2$  values obtained from the analysis in b  
442 applied to all epimutations.
- 443 d. Mean normalized small RNA levels within groups spanning different linearity in  
444 22G-RNA alterations.
- 445 e. Classification into fluctuating, bistable and gradual changes in small RNAs. Grey  
446 lines show each individual epimutation and the mean across each group is shown as  
447 a thick coloured line.
- 448 f. Association of different 22G-RNA dynamics with HRDE-1, piRNA and WAGO-1  
449 target genes. The p-value for a difference in proportion between targets and non-  
450 targets according to a Fisher's exact test is shown above each plot.
- 451 g. The duration of bistable and gradual changes is longer than fluctuating epimutable  
452 genes. The p-value for a difference in proportion between  $\leq 2$  or  $> 2$  generations of  
453 epimutations is shown above the plot.

454 **Supplementary Figure 6: Direct identification of genes with heritable variation**  
455 **in 22G-RNA levels.**

- 456 a. Test for short-term inheritance. By comparing the intergenerational variance with  
457 the overall variance across the lineage, genes with heritable variation in 22G-RNA  
458 levels are identified.
- 459 b. p-value and FDR histograms from the test for short-term inheritance, in lineages A  
460 and B.
- 461 c. Overlap of genes with heritable 22G-RNA levels with small RNA pathway gene  
462 targets.
- 463 d. Distribution duration of runs of consecutive generations with low intergenerational  
464 variance. These were defined as consecutive generations with a difference lower  
465 than 30% of the standard deviation in 22G-RNA levels across the lineage.
- 466 e. Examples of 22G-RNA dynamics at genes with heritable variation in 22G-RNA  
467 levels in lineages A and B.

468 **Supplementary Figure 7. Integration of 22G-RNA and mRNA count data.**

- 469 a. Visualisation of changes in 22G-RNA levels against changes at the mRNA level.  
470 Genes with significantly different mRNA levels between the high and low small RNA  
471 states are shown in green.

472 b. Correlation between the absolute change in 22G-RNA and mRNA levels, for all  
473 epimutations (top panel), and for genes with positively correlated (bottom left) and  
474 negatively correlated (bottom right) mRNA-22G changes.

475 c. Genes with correlated changes in 22G-RNAs and mRNAs are marginally enriched  
476 in the epimutations set (blue line) compared to random subsets of genes with >10  
477 22G-RNA normalised counts. This enrichment is highest for cases where there is a  
478 negative correlation between 22G-RNA and mRNA levels.

479 d-e. Example of gene with negatively correlated 22G-RNA and mRNA levels.

480 f. Visualisation of changes in 22G-RNA levels against changes at the mRNA level for  
481 genes with significantly different mRNA levels between the high and low small RNA  
482 states, coloured by chromatin domain location.

483 g. Comparison of the proportions of genes with positively and negatively correlated  
484 changes in 22G-RNAs and mRNAs in active and regulated chromatin domains.

485 **Supplementary Figure 8. Further analysis of variability in small RNA pathways**  
486 **and their target genes.**

487 a-b. Variability analysis of piRNAs (A) and miRNAs (B).

488 c. Epimutations unique to MA100 lines are hypervariable in the MA25 dataset.

489 d. Epimutations unique to MA25 lines are hypervariable in the MA100 dataset.

490 e. Epimutations from MA25 lines do not show increased variation at the mRNA level.

491 f. Epimutations from MA100 lines do not show increased variation at the mRNA  
492 level.

493 g-h. Correlation analysis between mRNA abundance and variability in 22G-RNAs, for  
494 genes with >20 22G normalised counts, separating piRNA, HRDE-1 and WAGO-1  
495 targets (F) and CSR-1 targets (G).

496 i. Epimutated CSR-1 targets show higher expression than the rest of epimutated  
497 genes, consistent with CSR-1 target status.

498 **Supplementary Figure 9. Epimutations at transposable elements and other**  
499 **repeats.**

500 a. Summary of epimutations at transposable elements (TEs) and other repeats. TEs  
501 are only moderately enriched in the epimutation sets from the MA25 and MA100  
502 lines, and are not enriched in the set of epimutations observed in the consecutive  
503 generation experiment.

504 b. Repeat class annotations of epimutated TEs and other repeats.

505 c. Small RNA level states for epimutated TEs and other repeats in MA25 and MA100  
506 lines, showing little correspondence between states.

507 d. Distribution of variance test p-values for TEs and other repeats compared to the  
508 rest of genes. No TEs or other repeats had significantly reduced variance within  
509 lineages after multiple testing correction.

510 e-f. Variability analysis of 22Gs mapping to TEs and other repeats in MA25 (e) and  
511 MA100 (f) lines, showing increased variability in comparison to CSR-1 targets.

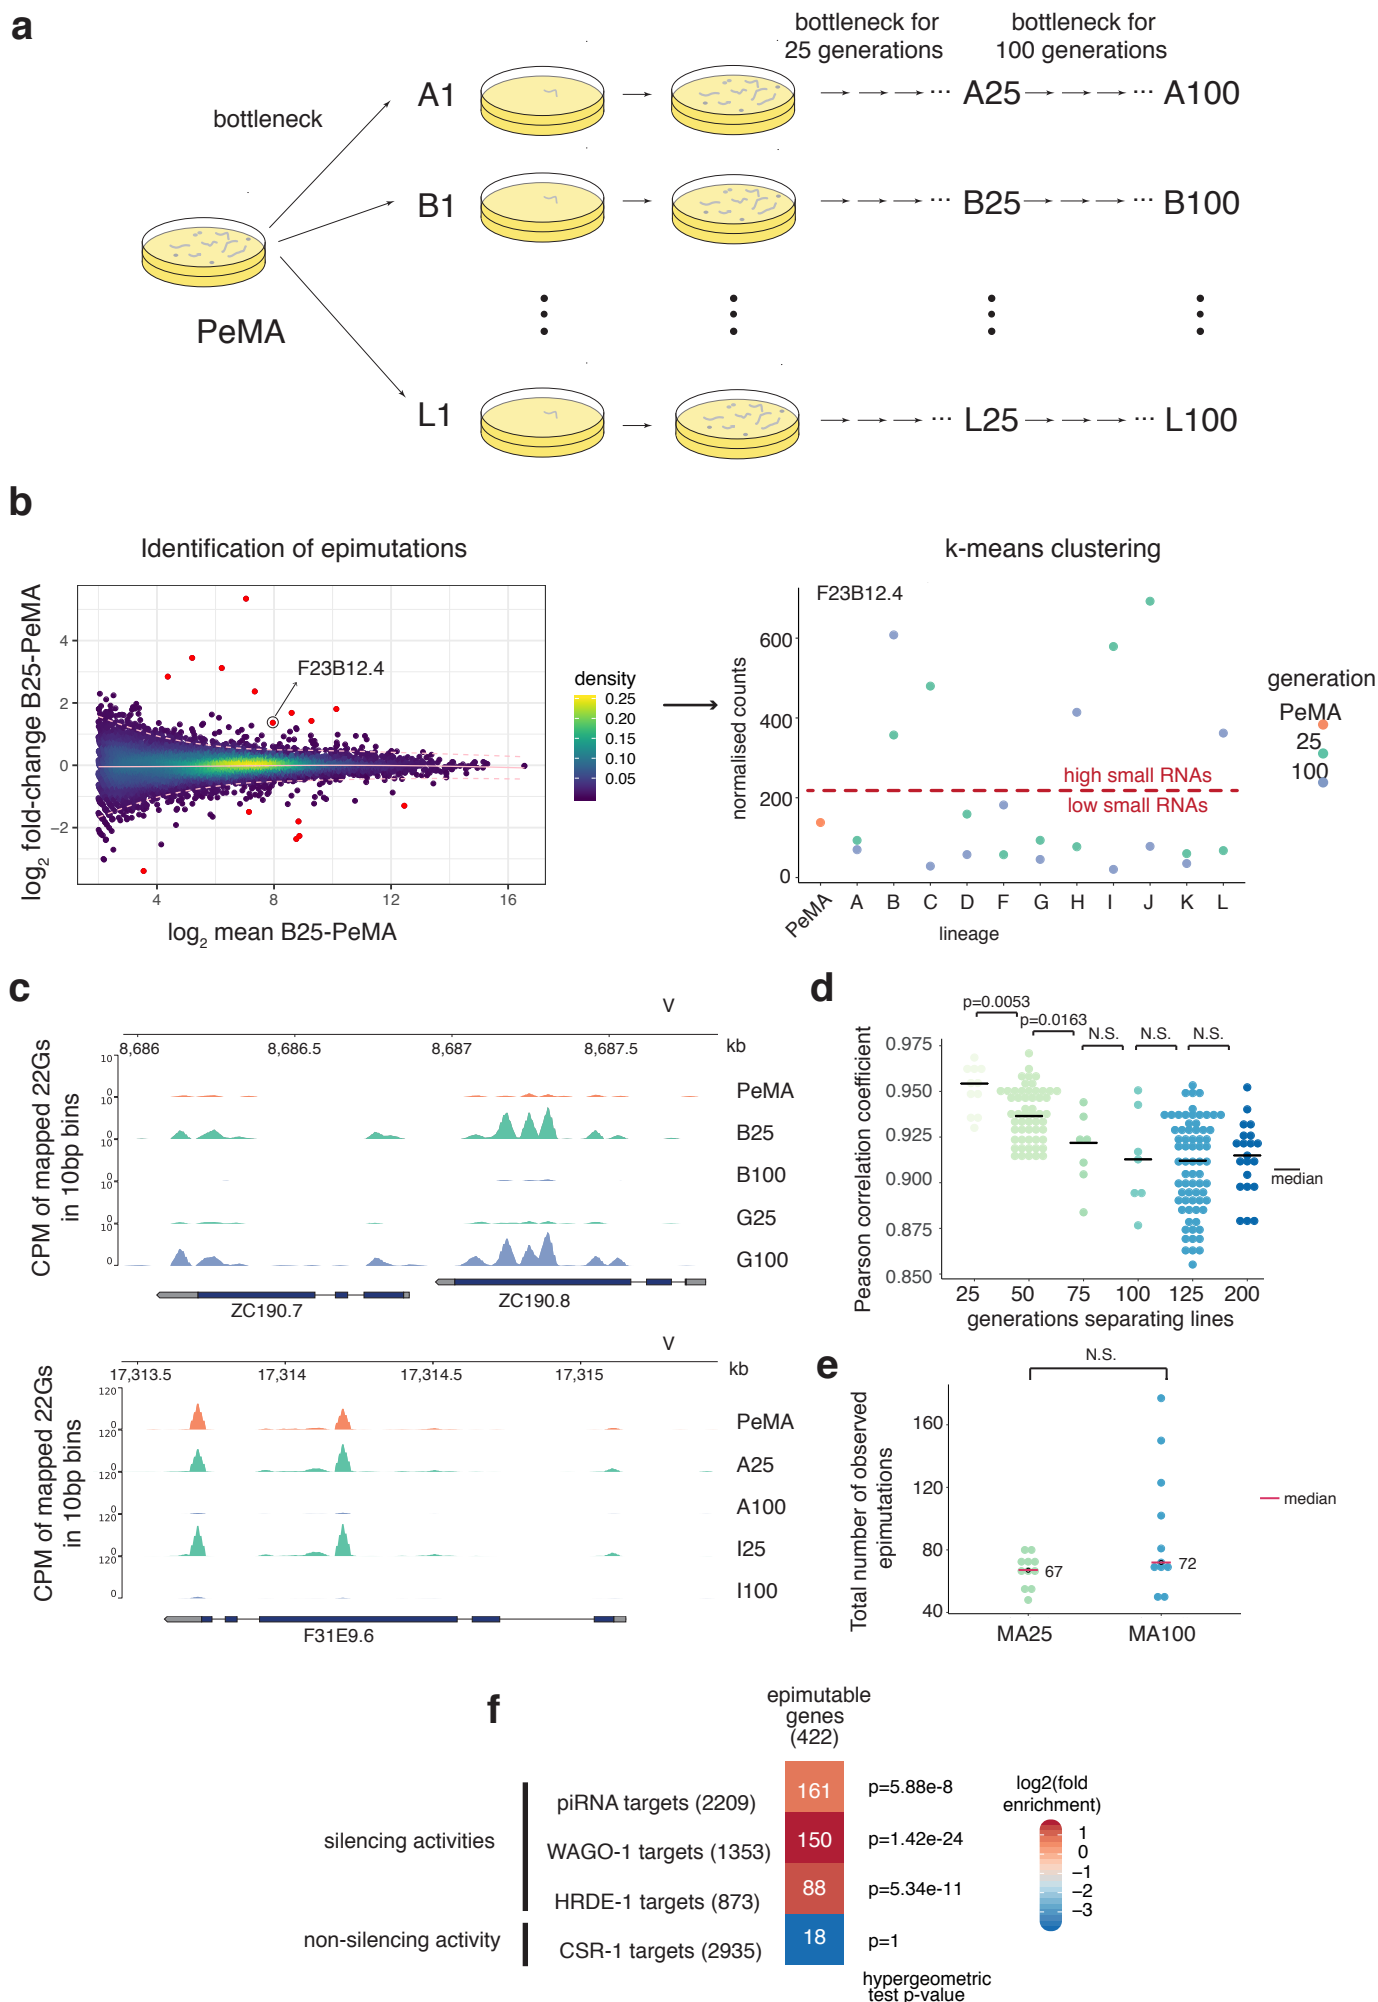

Figure 1

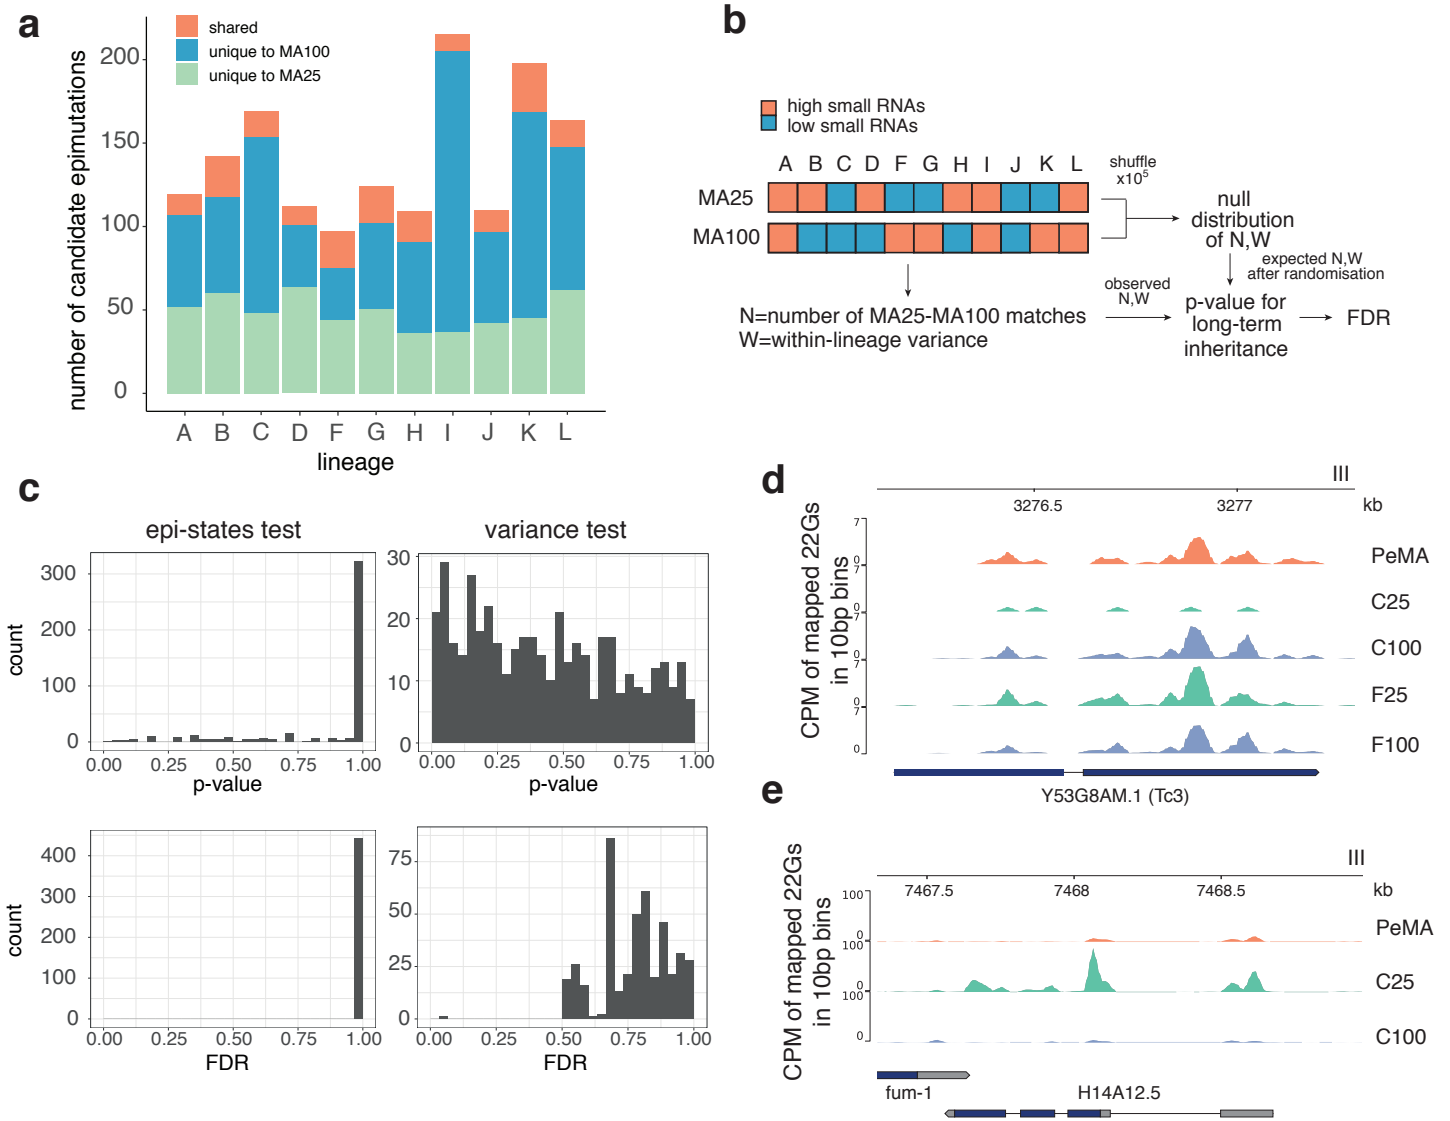

Figure 2



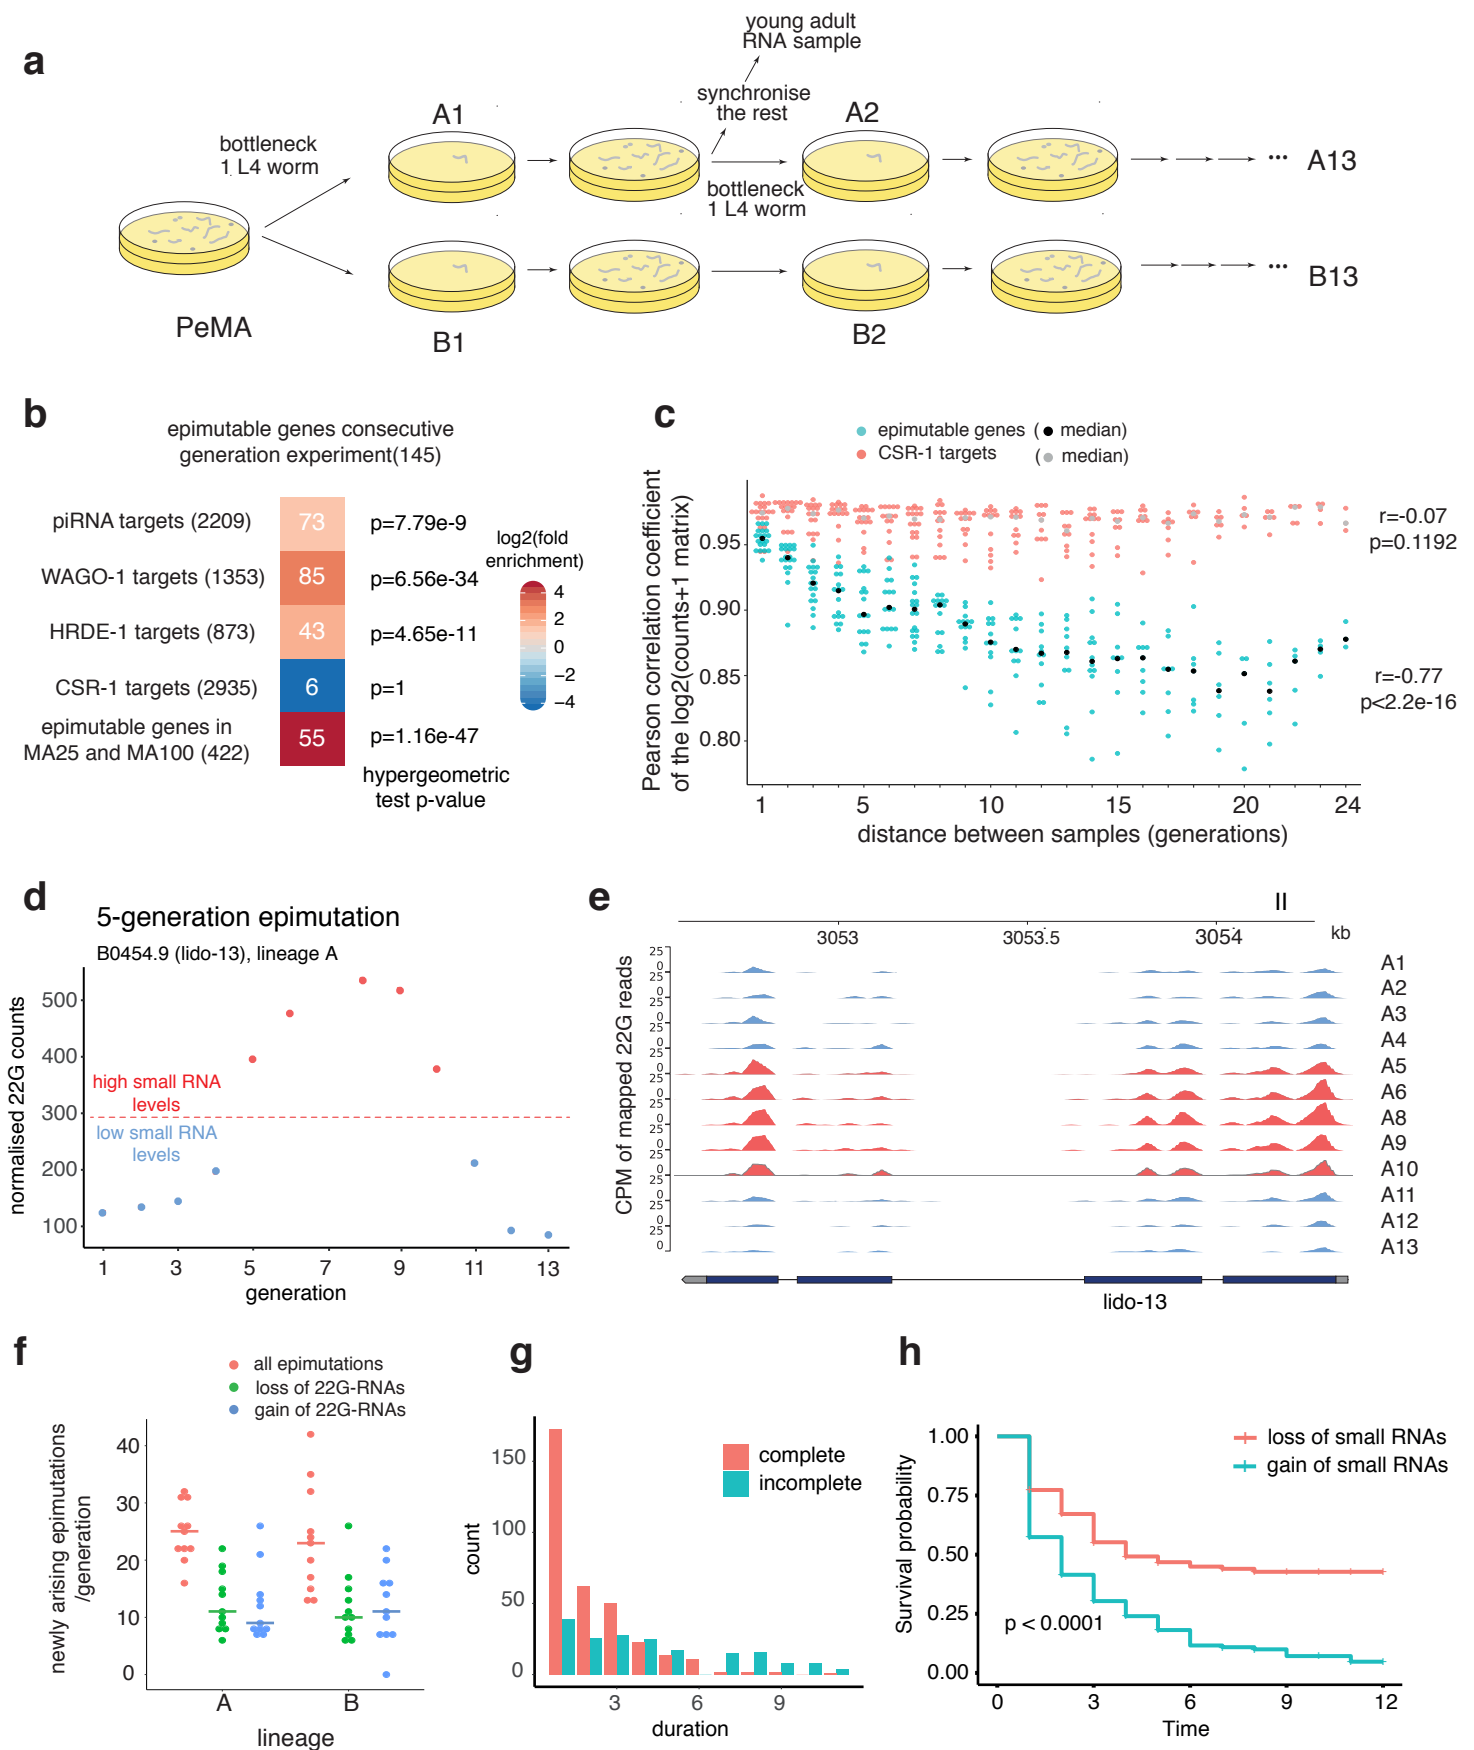

Figure 3

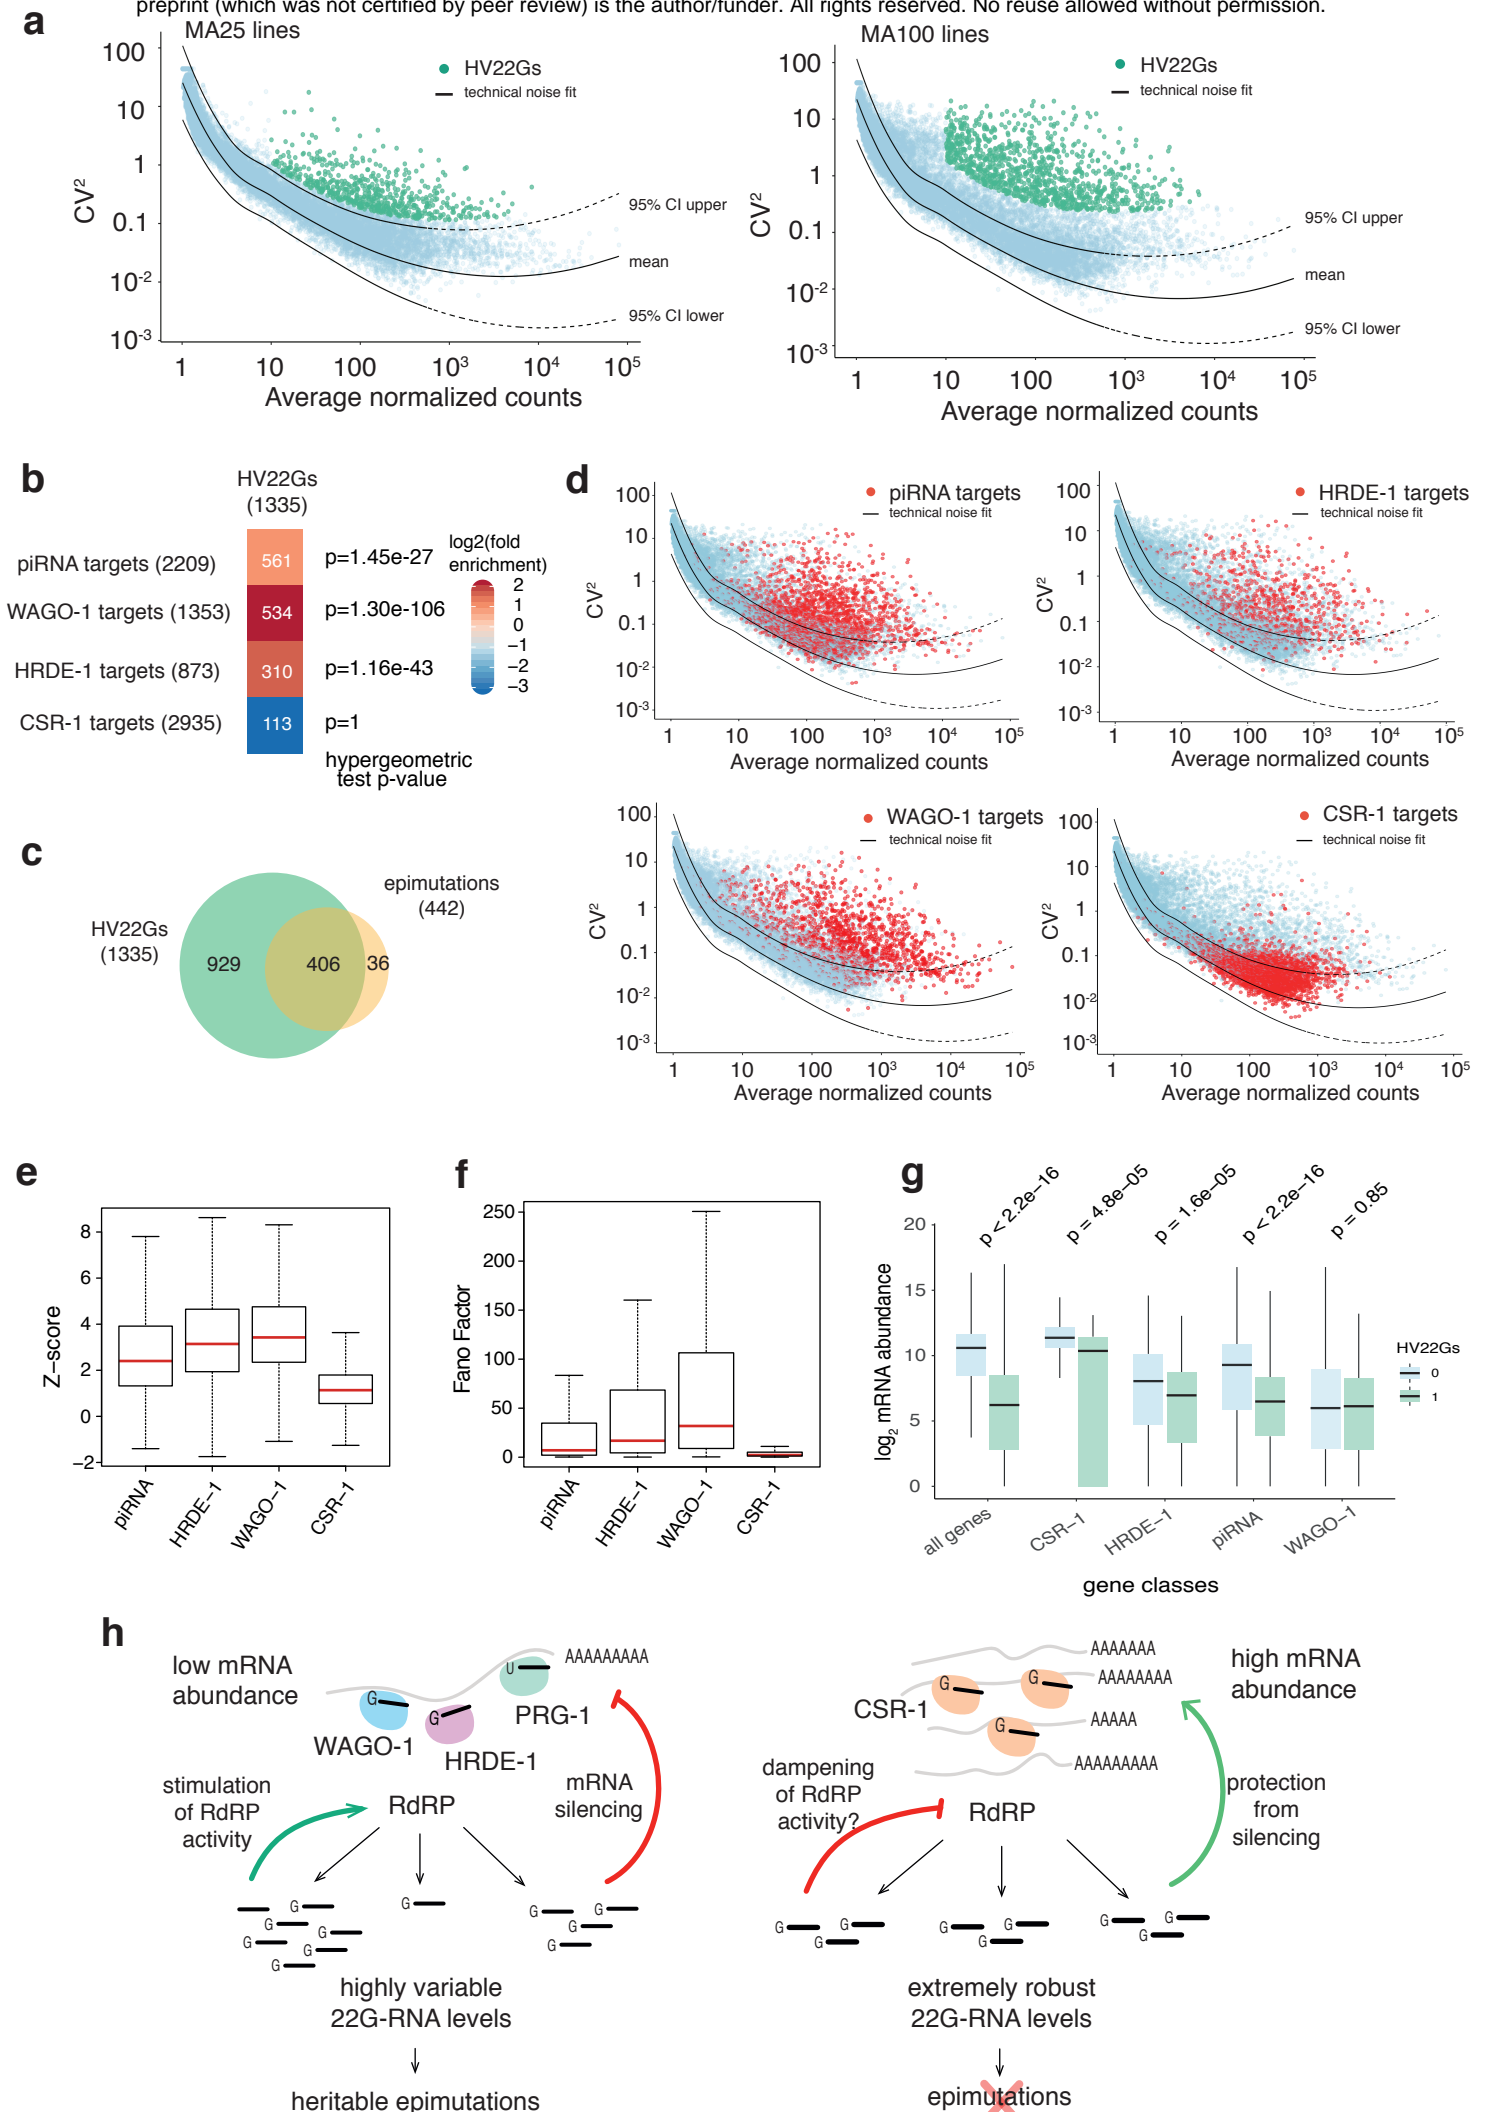

Figure 4

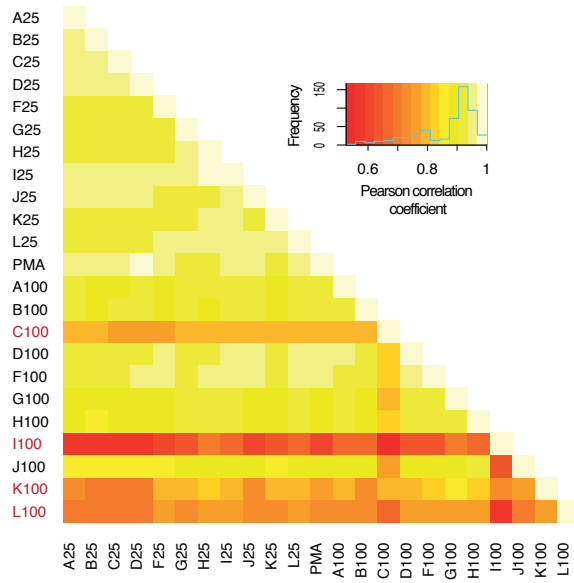

Figure S1

**A**

| Lineage | Mutations (MA400) | Epimutations (MA25) | Overlap (gene +1kb) | Epimutations (MA100) | Overlap (gene +1kb) |
|---------|-------------------|---------------------|---------------------|----------------------|---------------------|
| A       | 80                | 65                  | 0                   | 67                   | 0                   |
| B       | 99                | 83                  | 0                   | 79                   | 0                   |
| C       | 55                | 62                  | 0                   | 119                  | 0                   |
| D       | 59                | 76                  | 0                   | 47                   | 0                   |
| F       | 67                | 67                  | 0                   | 52                   | 0                   |
| G       | 54                | 75                  | 2                   | 72                   | 0                   |
| H       | 60                | 56                  | 0                   | 69                   | 0                   |
| I       | -                 | 50                  | -                   | 176                  | -                   |
| J       | -                 | 54                  | -                   | 68                   | -                   |
| K       | 51                | 71                  | 0                   | 147                  | 0                   |
| L       | -                 | 80                  | -                   | 99                   | -                   |

**B**

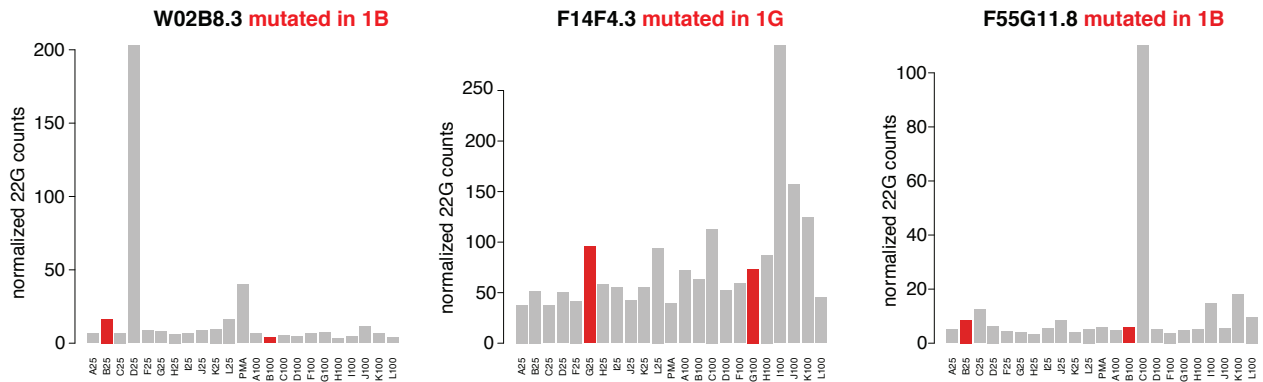

Figure S2

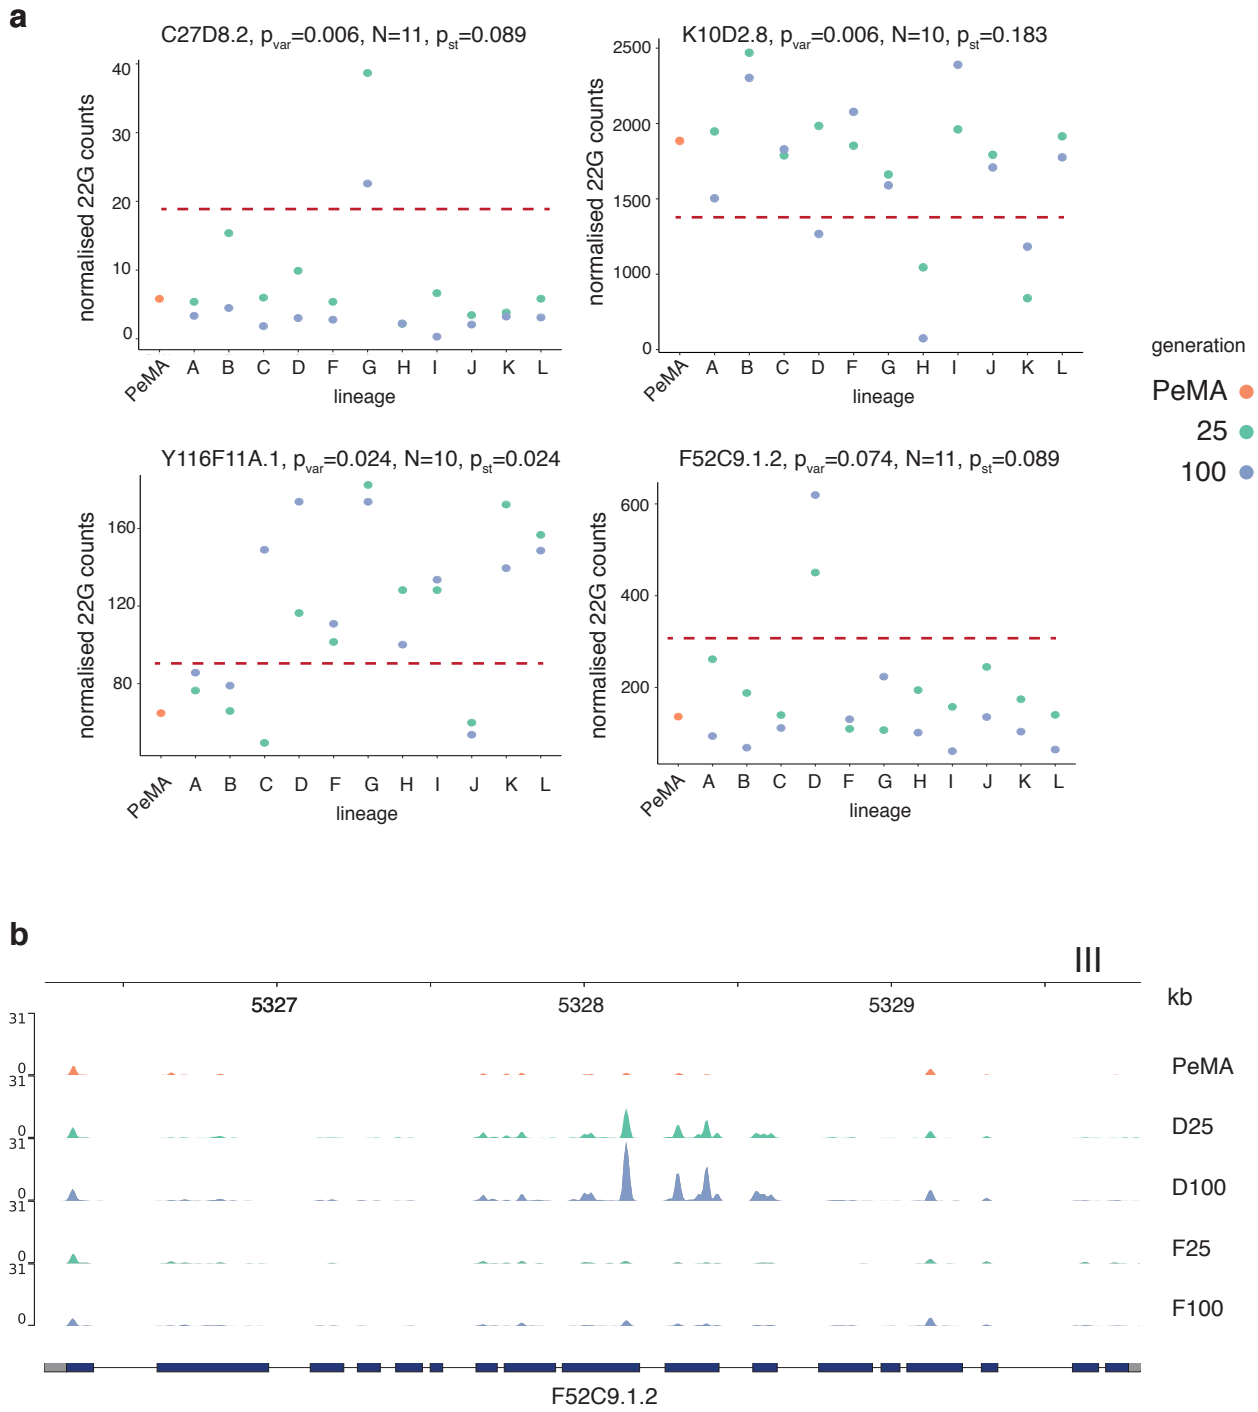

Figure S3



**a**

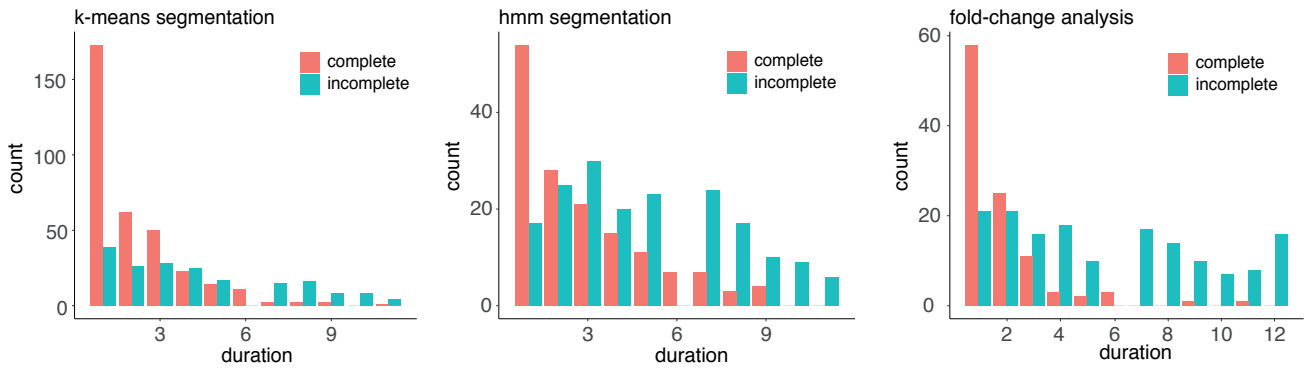

**b**

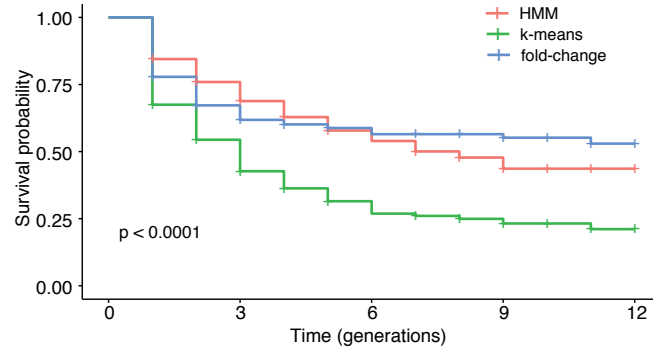

**c**

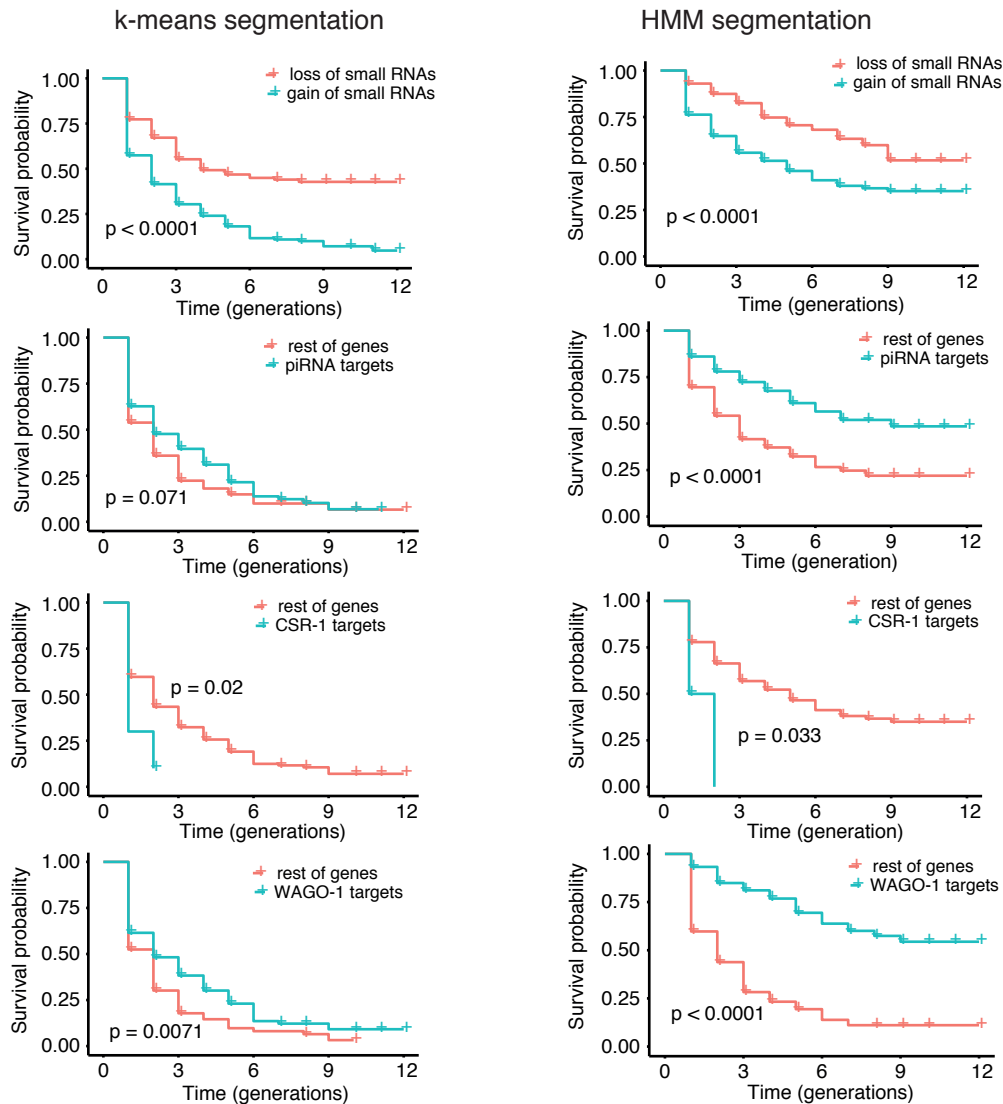

Figure S4

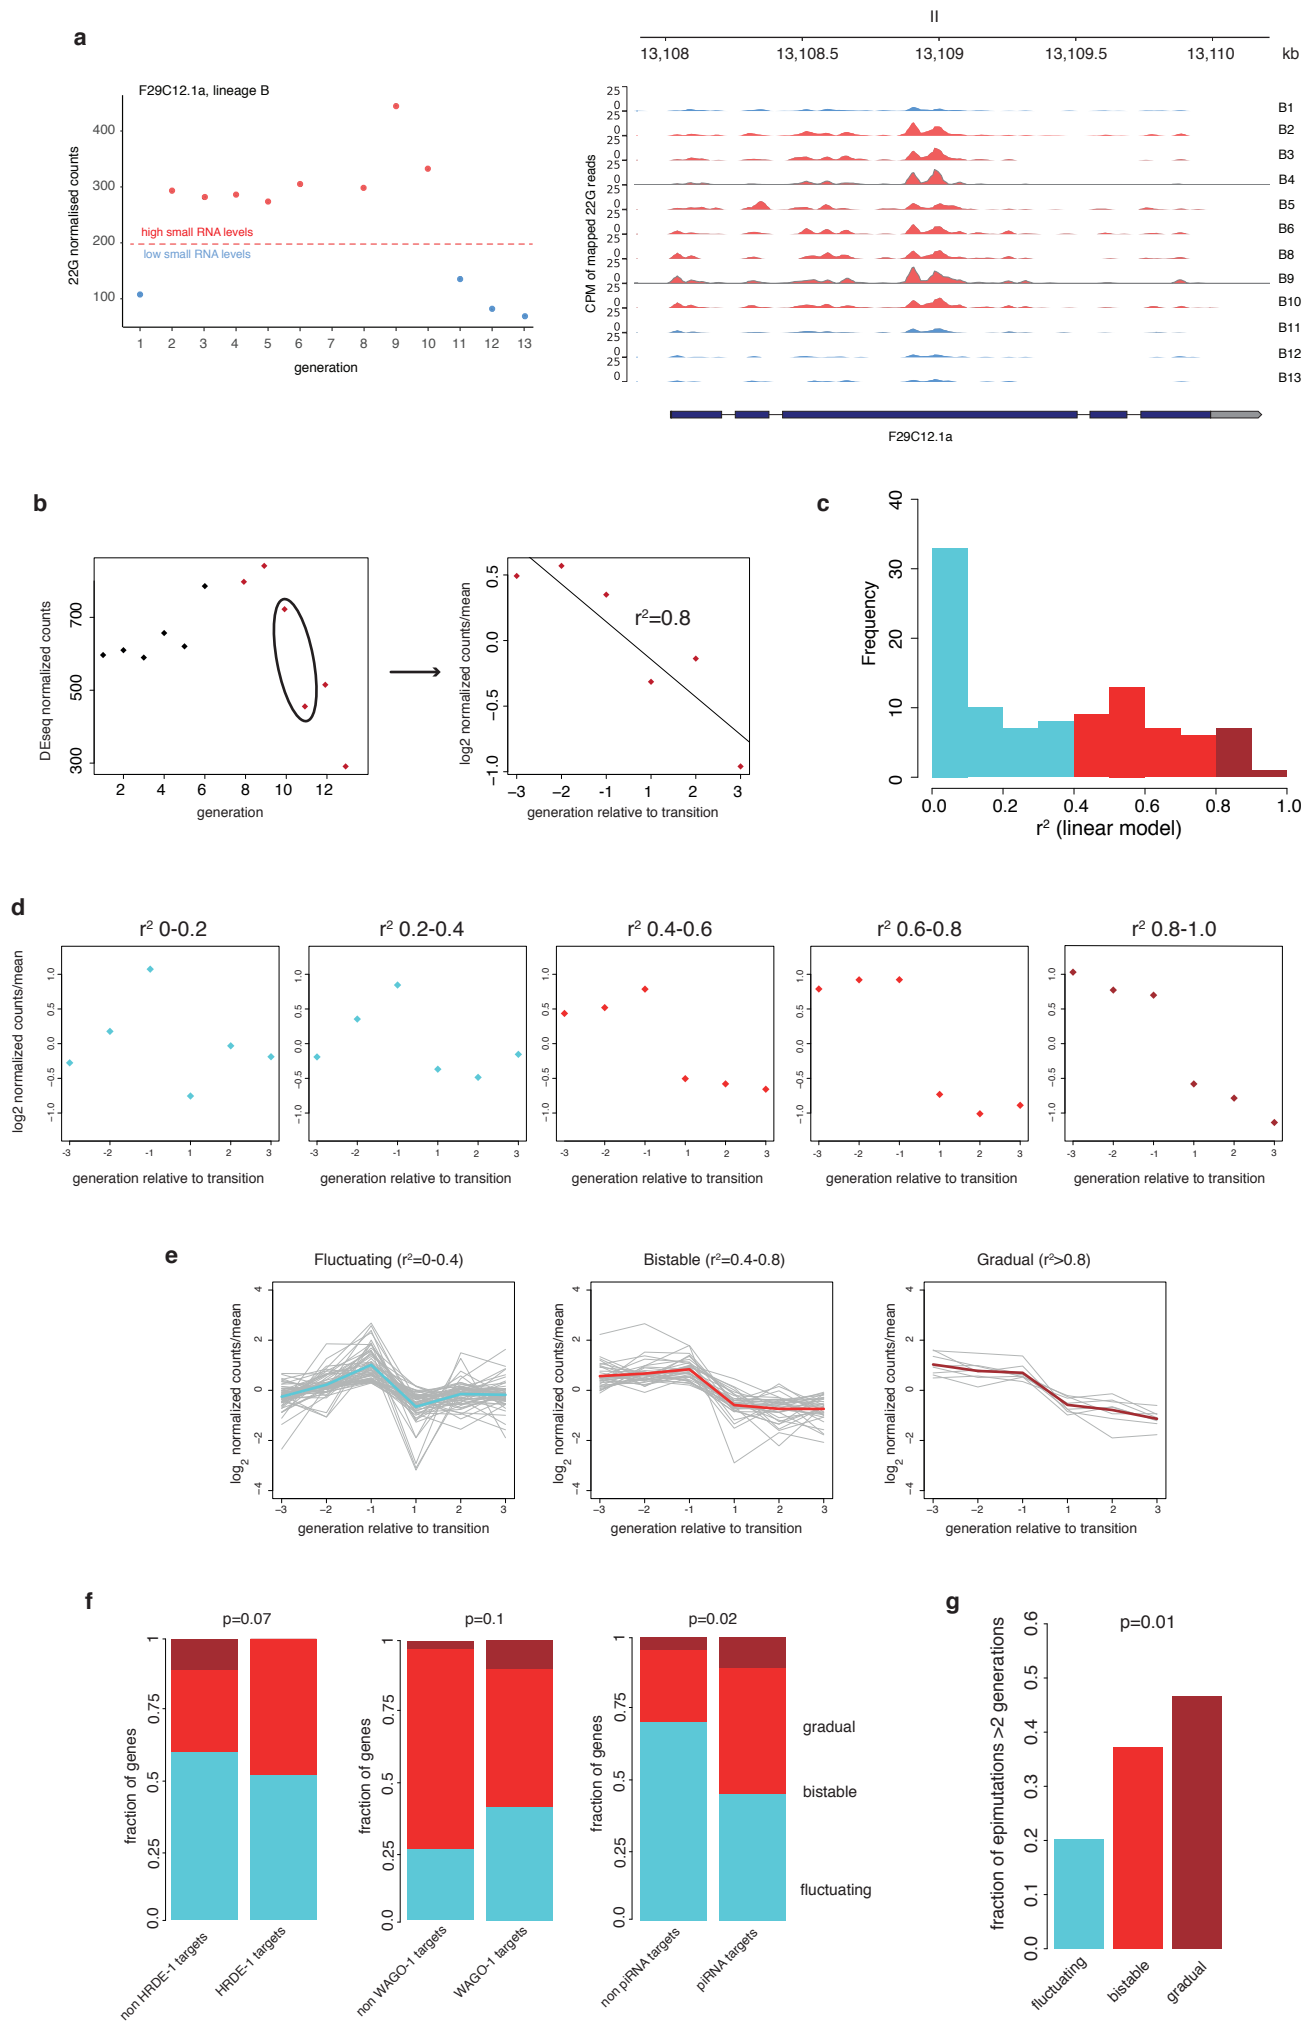

Figure S5

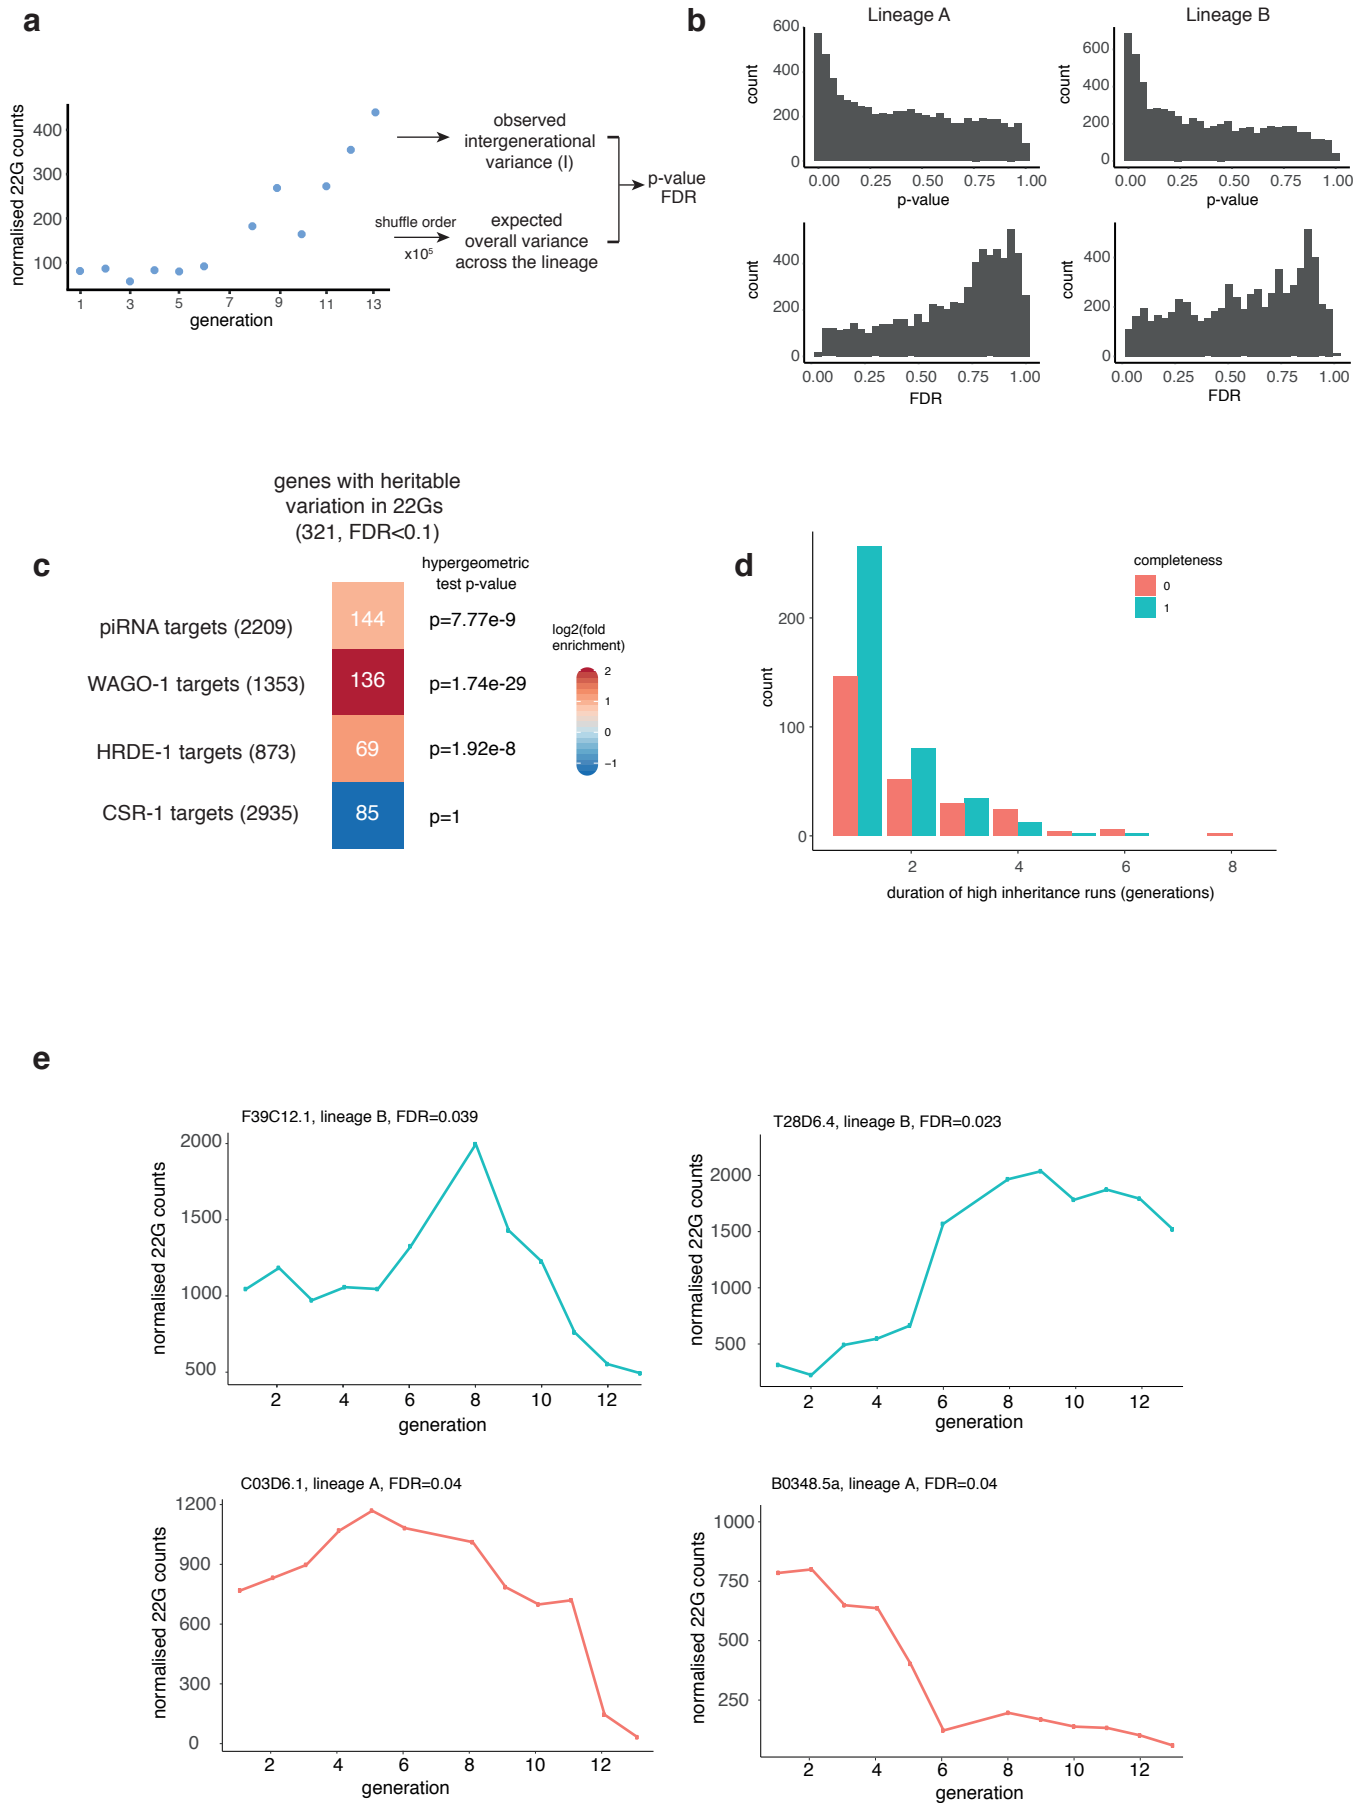

Figure S6

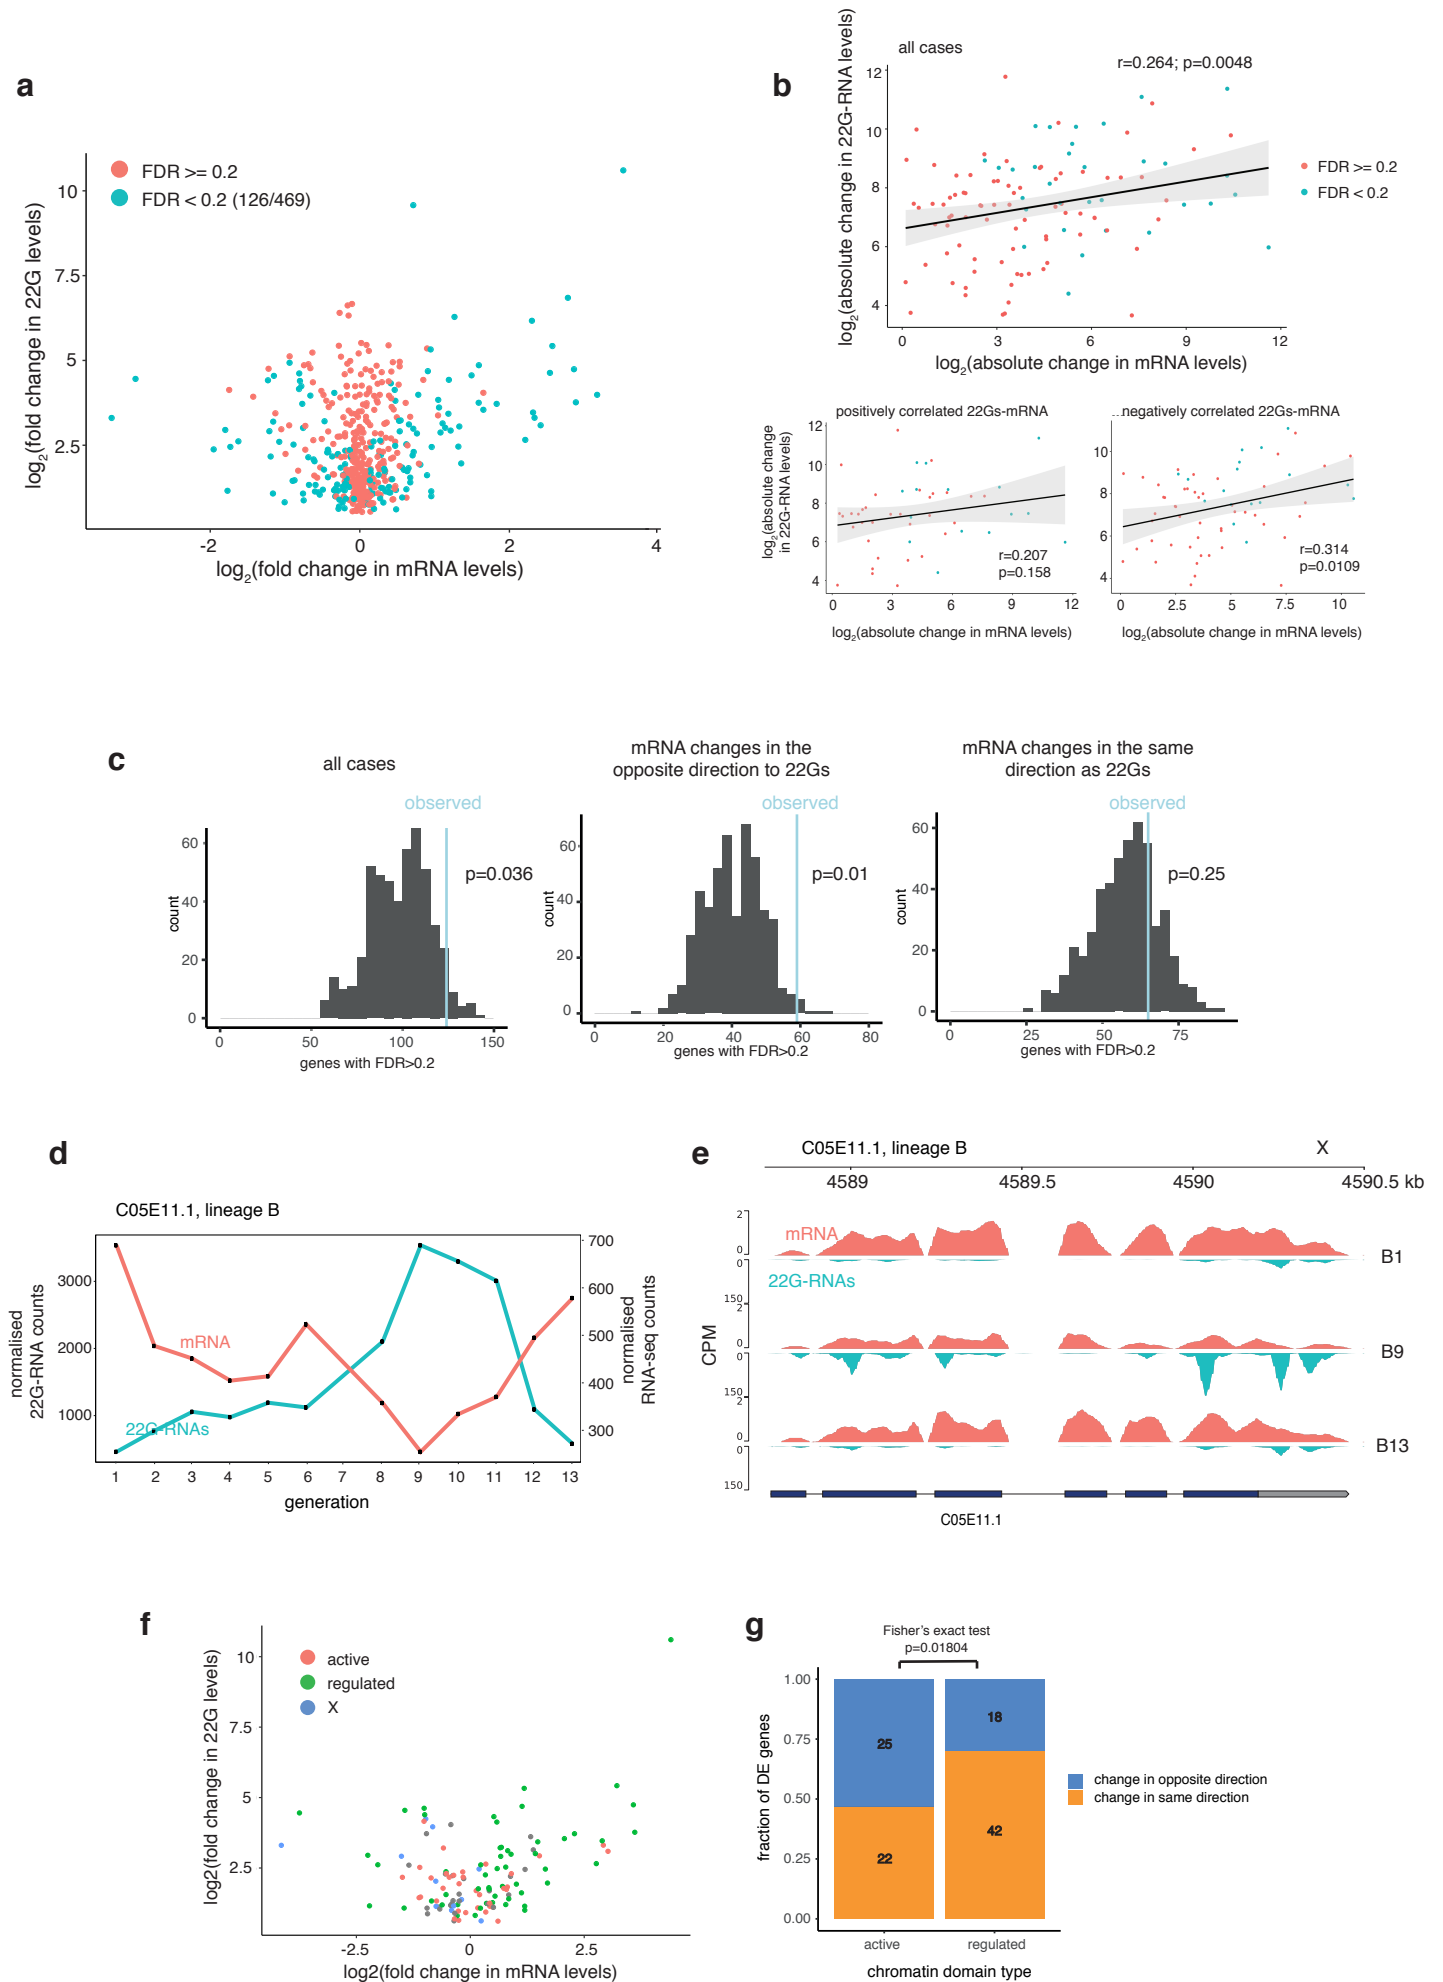

Figure S7

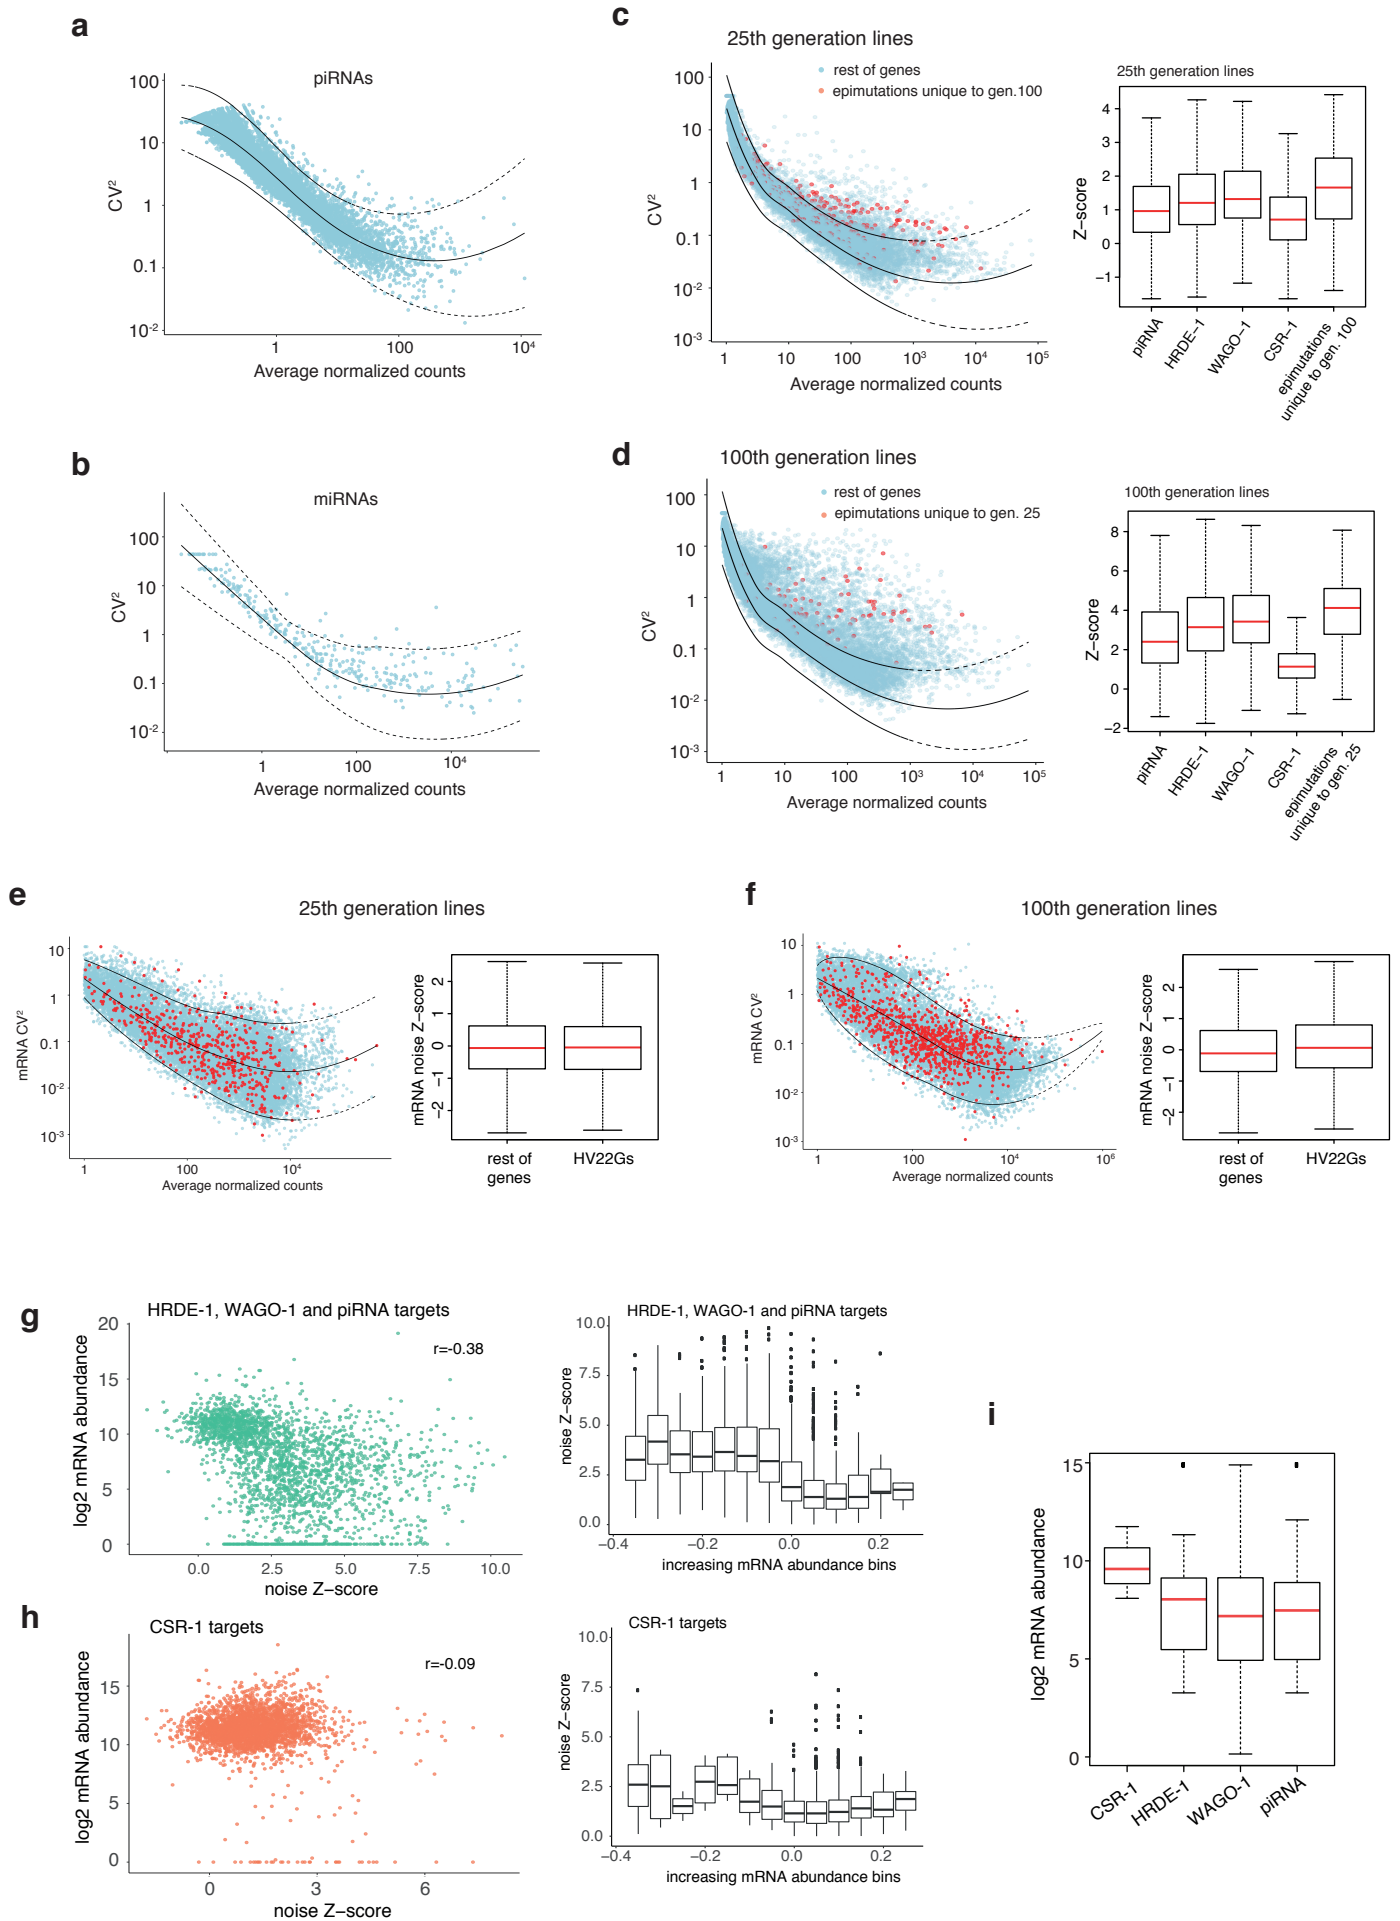

Figure S8

**a**

|                                     | Gen. 25-100 samples |          | Consecutive gen. samples |         |
|-------------------------------------|---------------------|----------|--------------------------|---------|
|                                     | -m 1*               | -M 1*    | -m 1*                    | -M 1*   |
| TEs/repeats with >10 22G normcounts | 205/618             | 384/618  | 203/618                  | 376/618 |
| Total epimutations                  | 422                 | 633      | 145                      | 178     |
| Epimutated TEs/repeats              | 13                  | 29       | 2                        | 1       |
| Hypergeometric test p-value         | 0.01                | 2.60E-04 | 0.42                     | 0.928   |

\* -m 1 (ignoring multiple mapping reads)

-M 1 (randomly assigning multiple mapping reads)

**b**

| -m 1           |           |  |
|----------------|-----------|--|
| Repeat class   | Frequency |  |
| LTR/Pao        | 5         |  |
| LINE           | 1         |  |
| DNA/Tc-Mar     | 3         |  |
| DNA/MULE-MuDR  | 1         |  |
| DNA/CMC-Mirage | 3         |  |

| -M 1              |           |  |
|-------------------|-----------|--|
| Repeat class      | Frequency |  |
| LTR/Pao           | 4         |  |
| LINE              | 4         |  |
| rRNA              | 3         |  |
| DNA/Tc-Mar        | 5         |  |
| DNA/MULE-MuDR     | 2         |  |
| DNA/CMC-Mirage    | 10        |  |
| DNA/PIF-Harbinger | 1         |  |

**c**

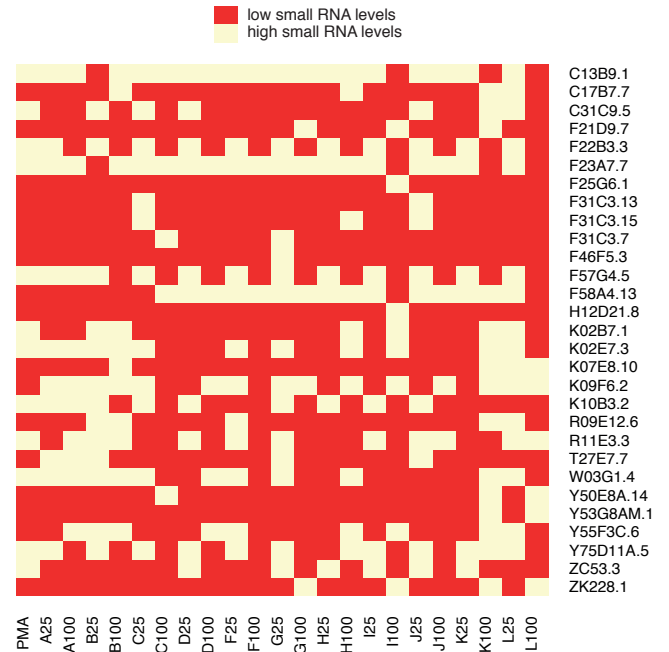

**d**

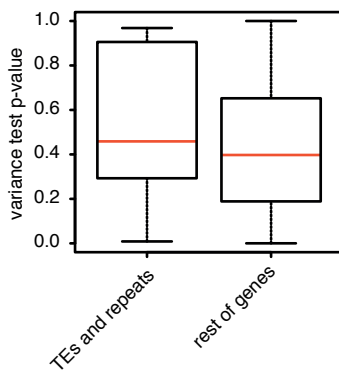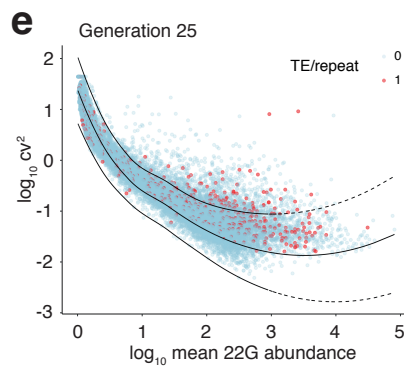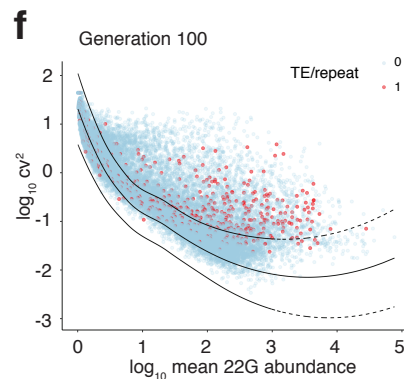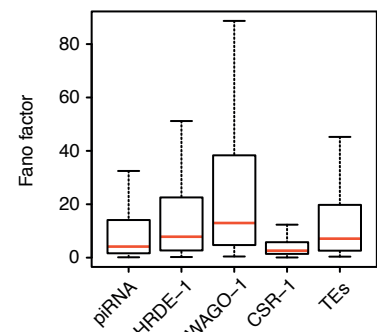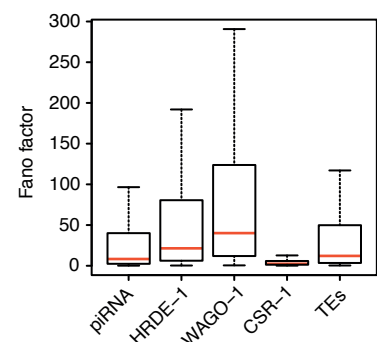

Figure S9

## Methods

### *Nematode culture*

*Caenorhabditis elegans* nematodes were grown in NGM plates seeded with OP50 *E. coli* at 20°C. 25<sup>th</sup> generation and 100<sup>th</sup> generation lines were grown as described in <sup>1</sup>. For the consecutive generation experiment, each lineage was founded by picking a single N2 L4 hermaphrodite worm (Day 1). On Day 4, a single L4 was bottlenecked into a new plate as a founder for the next generation. On Day 5, the rest of the worms were synchronised by hypochlorite treatment, and grown to the young adult stage in order to obtain RNA samples. This procedure was carried out for 13 generations, with exception of generation 7 where the RNA sample collection was not carried out.

### *Preparation of RNA samples and small RNA libraries*

Synchronised young adult hermaphrodites were washed off plates using M9, and collected into 15mL tubes. Worms were washed 3 additional times with M9, and 1mL Trizol was added for each 100 $\mu$ l of worms to proceed with Trizol-chloroform RNA extraction. RNA was precipitated overnight by adding 1 $\mu$ l glycogen and an equal volume of isopropanol.

For small RNA library preparation, 1 $\mu$ g (lineage A and B samples) or 2 $\mu$ g (25<sup>th</sup> and 100<sup>th</sup> generation samples) of RNA were incubated for 1h at 37°C with 5' RNA polyphosphatase (Epicentre) at a final concentration of 1U/ $\mu$ l, in a total volume of 20 $\mu$ l, in order to convert 5'PPP 22G-RNAs into clonable 5'P 22G-RNAs. RNA was phenol-chloroform extracted and precipitated overnight with 1 $\mu$ l glycogen, 1/10 volume 3M AcNA and 3 volumes 100% ethanol. Small RNA libraries were generated using the Illumina TruSeq Small RNA library preparation kit as per manufacturer's instructions, and gel-purified to size select 21-23nt inserts. For mRNA-seq, 1 $\mu$ g of total RNA was spiked-in with 100ng of *Schizosaccharomyces pombe* total RNA, and the mix was subjected to poly-A selection using the NEBNext polyA Magnetic Isolation Module. RNA-seq libraries were prepared using the NEBNext Ultra II Directional RNA Library Prep Kit for Illumina. Both types of libraries were sequenced on an Illumina HiSeq2500 instrument.

### *Processing of small RNA sequencing and RNA-seq data*

Small RNA libraries were trimmed using cutadapt v1.10<sup>2</sup>, and reads >18nt and <35nt were mapped using Bowtie v0.1.2<sup>3</sup> with parameters -v -m1 to the WS252 *C. elegans* genome. 22G reads were mapped with the same parameters to a *C. elegans* transcriptome file including WS252 annotated mRNA transcripts, ncRNA transcripts, pseudogenic transcripts, and transposon transcripts. For genes with multiple RNA isoforms, the longest isoform was selected and the rest of isoforms were filtered out. Antisense 22G read counts were computed for each RNA in the reference transcriptome. To visualise the signal of 22G-RNAs across the genome, bam files were converted to a bigwig format using deeptools v3.1.2<sup>4</sup> bamCoverage with parameters -bs 10 --smoothLength 30 --normalizeUsing CPM.



Additionally, we mapped the small RNA reads with parameters `-v 0 -M 1` to randomly assign multiple mapping reads in order to capture changes in 22G-RNAs derived from repetitive regions of the transcriptome, and we analyzed the two datasets (`-m 1` and `-M 1`) in parallel.

RNA-seq reads were mapped using Tophat v2.0.11<sup>5</sup> with parameters `-i 30 -l 20000`, to a combined reference index containing the WS252 *C. elegans* genome and the *Schizosaccharomyces pombe* genome (2018-06-01 PomBase release). *C. elegans* counts were recovered using htseq-count 0.9.1<sup>6</sup>, and a gtf file including longest isoform RNA annotations as described above. *S. pombe* counts were recovered using htseq-count, and the corresponding gtf file from the 2018-06-01 PomBase release.

### *Identification of epimutations*

RNA-seq and 22G-RNA counts were normalised using DEseq2<sup>7</sup>. Epimutations between any two samples were identified using the 22G-RNA data.  $\log_2(\text{fold changes})$  were plotted against the  $\log_2(\text{mean counts})$  for each gene (MA-plot), and a loess smoothing curve was fitted to the scatterplot. For each data point, a Z-score was derived by calculating the difference of the observed fold change minus the average of the loess fit, divided by the standard deviation of the loess fit. P-values were derived using a normal distribution, and corrected for multiple testing using the Benjamini-Hochberg False Discovery Rate (FDR) method<sup>8</sup>.

We defined epimutable genes in the 25<sup>th</sup> and 100<sup>th</sup> generation samples as those below an FDR threshold of  $1e-4$  in at least one pairwise comparison. Correlation analysis was done on this subset of genes, after  $\log_2$  transforming the count matrix+1 pseudocount. This analysis revealed that C100, I100, K100 and L100 have accumulated large differences in 22G levels in a large number of genes and are outliers compared to all the rest of samples. On the basis of this observation, we performed the subsequent analyses both in the absence and presence of these samples separately.

We defined epimutable genes in the consecutive generation samples as those with an FDR threshold of  $1e-4$  in at least one pairwise comparison. Correlation analysis was done on this subset of genes, after  $\log_2$  transforming the count matrix+1 pseudocount. This analysis revealed two groups of samples corresponding to early (1-8) and late (9-13) in the lineage. Since this effect likely corresponds to experimental variation, genes that showing systematically different levels of 22Gs between the two groups of samples as detected by DEseq2 (FDR<0.1) were excluded from the downstream analysis. Samples B1 and B4 behaved as outliers compared to the rest of samples, and, similarly, genes with different levels of 22Gs in these two samples were excluded from further analysis.

For each gene, we used unsupervised k-means clustering on the normalised counts for all samples, including those from the consecutive generations experiment. This allowed us to classify the samples in high and low small RNA level groups. The total

number of epimutations between any two samples was calculated on the basis of the group assignments.

#### *Test for long-term epigenetic inheritance*

For each gene, we calculated the number of matches (N) in the small RNA level states (high or low) between generation 25 and their corresponding generation 100 samples. We then randomised those states in both lineages  $10^5$  times in order to obtain a null distribution of N. A p-value was calculated as the fraction of cases in the null distribution where the simulated N equals or exceeds the observed N. In addition, in order to incorporate the quantitative range of the data into the test, we calculated for each gene the observed within-lineage variance (W) using the normalised count data, as the sum of the squared difference in 22G counts between samples of matching lineages, divided by the total number of lineages (11):

$$W = \sum_{i=1}^{11} \frac{(x_{100,i} - x_{25,i})^2}{11}$$

We then randomised the count data in both lineages  $10^5$  times in order to obtain a null distribution of W. A p-value was calculated as the fraction of cases in the null distribution where the simulated W is equal or less than the observed N. In both tests, p-values were corrected for multiple testing using the FDR method.

#### *Test for short-term epigenetic inheritance*

For each gene, we calculated an intergenerational variance (I) considering only pairs of consecutive generations:

$$I = \sum_{i=1}^{N-1} \frac{(x_i - x_{i+1})^2}{N}$$

We then randomised the order of the data points  $10^5$  times in order to obtain a null distribution of I, that reflects the overall variance across the lineage. A p-value was calculated as the fraction of cases in the null distribution where the simulated I is equal or less than the observed I. p-values were corrected for multiple testing using the FDR method.

Using the set of genes with significantly low intergenerational variance, we defined pairs of consecutive generations as showing high levels of inheritance if the difference in small RNA levels was less than 30% of the standard deviation of the set of data points across the lineage. We then quantified the distribution of durations of runs of high inheritance across all genes. The median duration of high inheritance runs was derived using survival analysis, incorporating censoring information to reflect that fact that some runs reach the end of the lineage, such that their exact duration is unknown.

#### *Quantification of epimutation duration*

We quantified epimutation duration using three different methods. Firstly, we used the high and low small RNA state assignments across the lineage for the set of epimutable genes. Secondly, we used depmixS4<sup>9</sup> to fit a 2-state Hidden Markov model to the count data across the lineage, in order to recover the trajectory of hidden states corresponding to high and low small RNA levels. The HMM fit was initialised by providing the mean of the high and low small RNA level states as initial guesses. Finally, in order to incorporate the continuous nature of the data more directly, we identified pairs of consecutive generations with a fold-change greater than 2 after adding 10 pseudocounts to the normalised 22G counts. For each of these, we calculated the number of generations for which the difference in small RNA levels remains equal or greater than 2-fold. We derived from these a distribution of epimutation duration, considering complete (finished within the lineage) and incomplete (reaching the end of the lineage) epimutations separately.

We used survival analysis to quantify the overall stability of epimutations, incorporating the duration of complete and incomplete epimutations, considering incomplete epimutations as censored observations. We tested the effect of 22G fold changes and mRNA fold changes on epimutation duration using a Cox proportional hazards model. We tested for differences in epimutation duration depending on small RNA pathway regulation using Kaplan-Meier estimators and a log-rank test.

To investigate the dynamics of the transitions between different small RNA states at epimutated genes we extracted 3 generations either side of the largest difference between successive generations to give a time period of 6 generations in total. Only genes where 3 generations either side of the transition could be extracted were considered. We normalized to the mean across the 6 generations and used a linear model,  $\log(x)=a \cdot t+b$  where  $x$  is normalized 22G-RNAs,  $t$  is generations relative to the transition, i.e.  $-2 \leq t \leq 3$ , and  $a$  and  $b$  are constants. The  $r^2$  was extracted from the fit. Qualitative examination of small RNA dynamics with different  $r^2$  values suggested three categories, which we labelled as fluctuating ( $r^2 < 0.4$ ), bistable ( $0.4 \leq r^2 < 0.8$ ) and gradual ( $r^2 \geq 0.8$ ), and these were used for further intersection with different categories of genes (see below for definition of gene classes).

#### *Integration of RNA-seq and small RNA sequencing data*

To analyze changes in mRNA expression associated with changes in 22G-RNA levels, we used a Wilcoxon rank sum test to compare the RNA-seq normalised counts between groups of samples with high and low small RNA levels, defined by k-means clustering as described above. We applied this analysis to all epimutable genes, using the 25<sup>th</sup> and 100<sup>th</sup> generation samples, and the consecutive generation samples. Multiple testing correction was applied using the Benjamini-Hochberg FDR method. We examined the relationship between the absolute change in 22G- RNA levels and mRNA levels, showing significant positive correlations.

To test whether genes with significant changes in mRNA levels between high and low small RNA level samples are enriched in the set of epimutable genes, we sampled 422 genes from the entire set of genes with >10 normalised counts times, calculated high and low 22G-RNA level groups, and determined the number of genes

from this set also showing significant changes in mRNA levels as described above. We repeated this analysis 10,000 times to generate a null distribution of the expected number of genes showing significant changes in mRNA levels, and compared it to the observed value in the set of epimutable genes. We examined all cases, and cases with positively and negative correlated 22G-RNA and mRNA levels separately.

#### *Variability analysis and identification of genes with hypervariable 22Gs (HV22Gs)*

We used the 25<sup>th</sup> and 100<sup>th</sup> generation samples to quantify the variation in 22G-RNA levels across lineages transcriptome-wide, and identify HV22Gs. To do this, we estimated the technical variance as the sum of squared differences between pairs  $(x_i, y_i)$  of technical duplicates of libraries, divided by 11 (the total number of pairs).

$$Tech = \sum_{i=1}^{11} \frac{(x_i - y_i)^2}{11}$$

We plotted the technical coefficients of variation against the mean 22G levels in a logarithmic scale, showing a decreasing relationship as typically seen in mRNA sequencing data. We then fit a loess smoothing curve, and used this fit as a baseline to identify HV22Gs.

We estimated the total observed variance as the sum of squared differences between all pairs of libraries, divided by the total number of comparisons:

$$Total = \sum_{i=1}^{11} \sum_{j=i+1}^{11} \frac{(x_i - x_j)^2 + (y_i - y_j)^2}{2 \binom{11}{2}} + \sum_{i,j=1}^{11} \frac{(x_i - y_j)^2}{11^2}$$

We plotted the total coefficient of variation against the mean 22G levels in a logarithmic scale, together with the technical variation fit (mean and 95% confidence intervals). In order to identify HV22Gs, we calculated the residuals of the total variance data to the technical fit, and divided by the standard deviation of the technical fit to obtain a Z-score and a p-value based on a normal distribution. We corrected for multiple testing using the FDR method.

To estimate the technical variation in mRNA-seq data, we used the counts from the *S. pombe* spiked-in total RNA. To remove variation due to spike-in ratios and sequencing depth, we downsampled each library to the minimum observed number of *S. pombe* and *C. elegans* total reads within (for the 25<sup>th</sup> and 100<sup>th</sup> generation data separately). We used two baselines to quantify mRNA variability, (1) the technical variation estimated from *S. pombe* counts, and (2) the overall variation observed from *C. elegans* counts.

#### *Definition of gene classes*

We sourced publicly available small RNA sequencing data from IP experiments for HRDE-1 (GSM948684 and GSM984685), WAGO-1 (SRR030711 and SRR030712) and CSR-1 (SRR030720 and SRR030721), processed it as described above, and defined their target genes as genes with at least 10rpm in the IP sample, and a 1.5-fold enrichment in the IP sample. piRNA targets were defined as genes exhibiting at least a two-fold decrease in 22Gs in a prg-1 background (SRR2140760 and SRR2140763), and 20rpm of 22Gs in the WT. Chromatin domain assignments were taken from Evans et. al., 2016 and lifted over to WS252. To annotate repetitive transcripts, we ran RepeatMasker v4.0.5<sup>10</sup> with parameters -nolow on the transcriptome file. Repetitive transcripts were defined as those with at least 80% of their length covered by RepeatMasker hits.

### Methods references

1. Konrad, A. *et al.* Mutational and transcriptional landscape of spontaneous gene duplications and deletions in *Caenorhabditis elegans*. *Proc. Natl. Acad. Sci.* **115**, 7386–7391 (2018).
2. Martin, M. Cutadapt removes adapter sequences from high-throughput sequencing reads. *EMBnet.journal; Vol 17, No 1 Next Gener. Seq. Data Anal.* (2011).
3. Langmead, B., Trapnell, C., Pop, M. & Salzberg, S. L. Ultrafast and memory-efficient alignment of short DNA sequences to the human genome. *Genome Biol.* **10**, R25 (2009).
4. Ramírez, F. *et al.* deepTools2: a next generation web server for deep-sequencing data analysis. *Nucleic Acids Res.* **44**, W160–W165 (2016).
5. Trapnell, C., Pachter, L. & Salzberg, S. L. TopHat: discovering splice junctions with RNA-Seq. *Bioinformatics* **25**, 1105–1111 (2009).
6. Anders, S., Pyl, P. T. & Huber, W. HTSeq--a Python framework to work with high-throughput sequencing data. *Bioinformatics* **31**, 166–169 (2015).
7. Love, M. I., Huber, W. & Anders, S. Moderated estimation of fold change and dispersion for RNA-seq data with DESeq2. *Genome Biol.* **15**, 550 (2014).
8. Benjamini, Y. & Hochberg, Y. Controlling the False Discovery Rate: A Practical and Powerful Approach to Multiple Testing. *J. R. Stat. Soc. Ser. B* **57**, 289–300 (1995).
9. Visser, I. & Speekenbrink, M. depmixS4: An R Package for Hidden Markov Models. *J. Stat. Software; Vol 1, Issue 7* (2010). doi:10.18637/jss.v036.i07
10. Smit, A., Hubley, R. & Green, P. RepeatMasker Open-4.0. (2013). Available at: <http://www.repeatmasker.org>.

### Data accessibility

Small RNA sequencing and RNA-seq datasets have been deposited in the Sequence Read Archive (PRJNA553063).
